# Supplementary material for: Spatial analysis of the glioblastoma proteome reveals specific molecular signatures and markers of survival
Source: PubMed Central journal article supplement (PMC9636229; doi:10.1038/s41467-022-34208-6), 2022-11-04
Supplement: 41467_2022_34208_MOESM1_ESM.pdf [file 41467_2022_34208_MOESM1_ESM.pdf]

## **Supplementary Information**

### **Spatial analysis of the glioblastoma proteome reveals specific molecular signatures and markers of survival**

Marie Duhamel<sup>1§</sup>, Lauranne Drelich<sup>1§</sup>, Maxence Wisztorski<sup>1§</sup>, Soulaymane Aboulouard<sup>1</sup>, Jean-Pascal Gimeno<sup>1</sup>, Nina Ogrinc<sup>1</sup>, Patrick Devos<sup>2</sup>, Tristan Cardon<sup>1</sup>, Michael Weller<sup>3</sup>, Fabienne Escande<sup>4</sup>, Fahed Zairi<sup>5</sup>, Claude-Alain Maurage<sup>4</sup>, Émilie Le Rhun<sup>1,3,4\*</sup>,  
Isabelle Fournier<sup>1,6\*</sup> and Michel Salzet<sup>1,6\*</sup>

<sup>1</sup>Univ.Lille, Inserm, CHU Lille, U1192, Laboratoire Protéomique, Réponse Inflammatoire et Spectrométrie de Masse (PRISM), F-59000 Lille, France

<sup>2</sup> Univ. Lille, CHU Lille, ULR 2694 - METRICS : Évaluation des technologies de santé et des pratiques médicales, F-59000 Lille, France

<sup>3</sup> Department of Neurology & Clinical Neuroscience Center, University Hospital and University of Zurich, Zurich, Switzerland

<sup>4</sup> CHU Lille, Service de biochimie et biologie moléculaire, CHU Lille, F-59000 Lille France

<sup>5</sup> CHU Lille, Service de neurochirurgie, F-59000 Lille, France

<sup>6</sup>Institut Universitaire de France (IUF), Paris, 75000, France

§ These authors contributed equally Marie Duhamel, Lauranne Drelich, Maxence Wisztorski

\* These authors jointly supervised this work Emilie Le Rhun, Isabelle Fournier, Michel Salzet

Corresponding authors

Correspondence to Marie Duhamel ([marie.duhamel@univ-lille.fr](mailto:marie.duhamel@univ-lille.fr)), Emilie Le Rhun ([emilie.lerhun@usz.ch](mailto:emilie.lerhun@usz.ch)), Isabelle Fournier ([isabelle.fournier@univ-lille.fr](mailto:isabelle.fournier@univ-lille.fr)) and Michel Salzet ([michel.salzet@univ-lille.fr](mailto:michel.salzet@univ-lille.fr))

**Supplementary Table 1.** Model cross-validation from the SpiderMass recorded in the positive ion mode from 30 different tumors using the “20% randomly taken” and the “1 patient out” methods. Percentage of good classifications are given including or excluding outliers.

| Model type                                      | ion mode        | n classes | n tested spectra | n passes   | n failures | N outliers | Correct classification rate (%) |                    |
|-------------------------------------------------|-----------------|-----------|------------------|------------|------------|------------|---------------------------------|--------------------|
|                                                 |                 |           |                  |            |            |            | Excluding outliers              | Including outliers |
| <b>Cross Validation by 20% randomly taken</b>   |                 |           |                  |            |            |            |                                 |                    |
| <b>Glioma</b>                                   | <b>Positive</b> | <b>3</b>  | <b>135</b>       | <b>124</b> | <b>0</b>   | <b>11</b>  | <b>100%</b>                     | <b>91.85%</b>      |
| <b>Cross Validation by 1 patient out method</b> |                 |           |                  |            |            |            |                                 |                    |
| <b>Glioma</b>                                   | <b>Positive</b> | <b>3</b>  | <b>135</b>       | <b>105</b> | <b>8</b>   | <b>22</b>  | <b>92.92%</b>                   | <b>77.78%</b>      |

**Supplementary Table 2.** Histological composition of each of the three regions identified by MALDI-MSI. The percentage of micro-extracted points in the histological areas was calculated for each molecular region (yellow-B, red-A, and blue-C).

| Region | Tumor | Very dense infiltration | dense infiltration | necrosis+ tumor | MVP+ tumor | tumor+ inflammation | necrosis |
|--------|-------|-------------------------|--------------------|-----------------|------------|---------------------|----------|
| yellow | 45%   | 0%                      | 0%                 | 25%             | 5%         | 0%                  | 20%      |
| red    | 39.3% | 14.3%                   | 28.6%              | 10.7%           | 3.6%       | 3.6%                | 0%       |
| blue   | 73.6% | 5.7%                    | 2.3%               | 3.4%            | 12.6%      | 1.1%                | 1.1%     |

**Supplementary Table 3.** List of the proteomics extraction points and their associated region

| Extraction point | Region | Extraction point | Region | Extraction point | Region |
|------------------|--------|------------------|--------|------------------|--------|
| 12-1             | A      | 48-1             | B      | 34-2             | C      |
| 12-2             | A      | 53-1             | B      | 34-3             | C      |
| 12-3             | A      | 9-2              | B      | 35-1             | C      |
| 12-4             | A      | 10-1             | C      | 35-2             | C      |
| 14-1             | A      | 10-2             | C      | 35-3             | C      |
| 14-2             | A      | 1-1              | C      | 36-3             | C      |
| 14-3             | A      | 1-2              | C      | 37-1             | C      |
| 20-1             | A      | 13-1             | C      | 38-2             | C      |
| 20-2             | A      | 13-2             | C      | 39-1             | C      |
| 20-3             | A      | 13-3             | C      | 39-3             | C      |
| 20-4             | A      | 15-1             | C      | 39-4             | C      |
| 21-1             | A      | 15-2             | C      | 4-1              | C      |
| 21-2             | A      | 15-3             | C      | 41-1             | C      |
| 25-1             | A      | 16-1             | C      | 41-2             | C      |
| 25-2             | A      | 16-2             | C      | 41-3             | C      |
| 25-3             | A      | 16-3             | C      | 42-2             | C      |
| 31-1             | A      | 17-1             | C      | 42-3             | C      |
| 31-2             | A      | 17-2             | C      | 43-1             | C      |
| 31-3             | A      | 17-3             | C      | 44-1             | C      |
| 32-1             | A      | 17-4             | C      | 44-2             | C      |
| 36-1             | A      | 19-1             | C      | 44-3             | C      |
| 36-2             | A      | 19-2             | C      | 45-1             | C      |
| 43-2             | A      | 2-1              | C      | 45-2             | C      |
| 46-3             | A      | 22-1             | C      | 46-1             | C      |
| 49-3             | A      | 22-2             | C      | 46-2             | C      |
| 49-4             | A      | 2-3              | C      | 47-1             | C      |
| 5-1              | A      | 24-1             | C      | 47-2             | C      |
| 5-2              | A      | 24-2             | C      | 48-2             | C      |
| 1-3              | B      | 24-3             | C      | 48-3             | C      |
| 2-2              | B      | 24-4             | C      | 49-1             | C      |
| 26-1             | B      | 25-4             | C      | 49-2             | C      |
| 27-1             | B      | 25-5             | C      | 50-1             | C      |
| 27-2             | B      | 26-2             | C      | 50-2             | C      |
| 27-3             | B      | 28-1             | C      | 50-3             | C      |
| 32-2             | B      | 28-2             | C      | 51-1             | C      |
| 32-3             | B      | 29-1             | C      | 51-2             | C      |
| 37-2             | B      | 29-2             | C      | 51-3             | C      |
| 37-3             | B      | 29-3             | C      | 53-2             | C      |

|             |          |             |          |             |          |
|-------------|----------|-------------|----------|-------------|----------|
| <b>38-1</b> | <b>B</b> | <b>30-1</b> | <b>C</b> | <b>53-3</b> | <b>C</b> |
| <b>38-3</b> | <b>B</b> | <b>30-2</b> | <b>C</b> | <b>6-1</b>  | <b>C</b> |
| <b>39-2</b> | <b>B</b> | <b>33-1</b> | <b>C</b> | <b>8-1</b>  | <b>C</b> |
| <b>4-2</b>  | <b>B</b> | <b>33-2</b> | <b>C</b> | <b>8-2</b>  | <b>C</b> |
| <b>42-1</b> | <b>B</b> | <b>33-3</b> | <b>C</b> | <b>8-3</b>  | <b>C</b> |
| <b>47-3</b> | <b>B</b> | <b>33-4</b> | <b>C</b> | <b>9-1</b>  | <b>C</b> |
| <b>47-4</b> | <b>B</b> | <b>34-1</b> | <b>C</b> | <b>9-3</b>  | <b>C</b> |

**Supplementary Table 4.** Ghost proteins overexpressed in the 3 regions A B C

| GROUP | protein accession | protein length (a.a.) | molecular weight (kDa) | isoelectric point | gene symbol          | type  | localization |
|-------|-------------------|-----------------------|------------------------|-------------------|----------------------|-------|--------------|
| C     | IP_063564         | 113                   | 12.39                  | 9.26              | <i>CLDN19</i>        | mRNA  | 3'UTR        |
| C     | IP_065285         | 48                    | 5.17                   | 8.97              | <i>C8B</i>           | mRNA  | CDS          |
| C     | IP_072691         | 36                    | 4.26                   | 8.51              | <i>CD84</i>          | mRNA  | 3'UTR        |
| C     | IP_073718         | 85                    | 9.63                   | 10.84             | <i>CCDC181</i>       | mRNA  | CDS          |
| C     | IP_079312         | 388                   | 42.34                  | 5.71              | <i>EDARADD</i>       | mRNA  | 3'UTR        |
| C     | IP_092740         | 46                    | 5.08                   | 10.69             | <i>TTN</i>           | mRNA  | CDS          |
| C     | IP_219633         | 35                    | 3.95                   | 5.67              | <i>POSTN</i>         | mRNA  | 3'UTR        |
| C     | IP_2277691        | 46                    | 5.53                   | 8.78              | <i>RTTN</i>          | mRNA  | CDS          |
| C     | IP_2303139        | 56                    | 6.24                   | 6.49              | <i>LOC105369735</i>  | ncRNA | -            |
| C     | IP_2323408        | 61                    | 6.86                   | 8.55              | <i>LOC105376126</i>  | ncRNA | -            |
| C     | IP_2348387        | 31                    | 3.34                   | 7.26              | <i>COL19A1</i>       | mRNA  | 5'UTR        |
| C     | IP_235425         | 38                    | 4.24                   | 10.31             | <i>HCN4</i>          | mRNA  | 3'UTR        |
| C     | IP_2376460        | 57                    | 6.73                   | 7.36              | <i>EPHA6</i>         | mRNA  | 3'UTR        |
| C     | IP_2393992        | 43                    | 5.22                   | 11.65             | <i>LOC105376830</i>  | ncRNA | -            |
| C     | IP_256988         | 39                    | 4.52                   | 9.45              | <i>TBX21</i>         | mRNA  | 3'UTR        |
| C     | IP_261897         | 41                    | 4.44                   | 9.67              | <i>AC108004.2</i>    | ncRNA | -            |
| C     | IP_557239         | 90                    | 10.19                  | 9.53              | <i>TUBB4AP1</i>      | ncRNA | -            |
| C     | IP_559054         | 30                    | 3.56                   | 4.27              | <i>SLITRK2</i>       | mRNA  | 5'UTR        |
| C     | IP_563986         | 424                   | 47.8                   | 4.43              | <i>KRT8P11</i>       | ncRNA | -            |
| C     | IP_572422         | 212                   | 24.18                  | 4.64              | <i>TUBBP1</i>        | ncRNA | -            |
| C     | IP_580018         | 247                   | 29.04                  | 11.36             | <i>RPL7P32</i>       | ncRNA | -            |
| C     | IP_590938         | 74                    | 8.75                   | 10.05             | <i>HMGB3P18</i>      | ncRNA | -            |
| C     | IP_629960         | 30                    | 3.57                   | 9.69              | <i>LRRC34</i>        | ncRNA | -            |
| C     | IP_669601         | 75                    | 8.32                   | 10.63             | <i>HIST2H2BB</i>     | ncRNA | -            |
| C     | IP_671464         | 249                   | 26.94                  | 8.21              | <i>TPI1P1</i>        | ncRNA | -            |
| C     | IP_701463         | 179                   | 20.51                  | 9.05              | <i>CTD-2541J13.2</i> | ncRNA | -            |
| C     | IP_739889         | 139                   | 15.18                  | 5.67              | <i>GOLGA6L9</i>      | ncRNA | -            |
| C     | IP_752010         | 59                    | 6.39                   | 10.62             | <i>MIPOL1</i>        | mRNA  | 3'UTR        |
| C     | IP_774693         | 75                    | 8.68                   | 3.92              | <i>TUBAP2</i>        | ncRNA | -            |
| C     | IP_774695         | 374                   | 41.01                  | 5.68              | <i>TUBAP2</i>        | ncRNA | -            |
| A     | IP_2390879        | 36                    | 4.08                   | 5.49              | <i>LOC107985743</i>  | ncRNA | -            |
| A     | IP_244732         | 78                    | 8.56                   | 7.13              | <i>KIFC3</i>         | mRNA  | 5'UTR        |
| B     | IP_156671         | 120                   | 14.22                  | 10.43             | <i>SLC13A1</i>       | mRNA  | 3'UTR        |
| B     | IP_222588         | 58                    | 6.32                   | 11.27             | <i>CPB2-AS1</i>      | ncRNA | -            |
| B     | IP_2389079        | 29                    | 2.98                   | 8.35              | <i>MYT1L</i>         | mRNA  | 5'UTR        |
| B     | IP_265416         | 32                    | 3.81                   | 10.78             | <i>LIPG</i>          | mRNA  | CDS          |
| B     | IP_273562         | 76                    | 8.34                   | 11.89             | <i>LGI4</i>          | mRNA  | 5'UTR        |
| B     | IP_278725         | 69                    | 7.77                   | 10.83             | <i>ZNF888</i>        | mRNA  | CDS          |

|   |           |     |       |      |                     |       |   |
|---|-----------|-----|-------|------|---------------------|-------|---|
| B | IP_592742 | 86  | 9.64  | 5.86 | <i>KRT18P64</i>     | ncRNA | - |
| B | IP_602497 | 38  | 4.24  | 5.65 | <i>CTD-2151A2.2</i> | ncRNA | - |
| B | IP_672223 | 178 | 20.37 | 5.14 | <i>GBP1P1</i>       | ncRNA | - |





- A.** Scanned pictures after hematoxylin-eosin staining of the 46 glioblastoma tumors
- B.** Pathologist annotations of the glioblastoma samples. The pathologist annotated each sample's different regions of interest (tumors, endothelial proliferation, necrosis, infiltration, blood...).
- C.** MALDI MSI images of characteristics  $m/z$  ions for each group.
- D.** Ward clustering method gives 3 main branches with the same characteristic ions.
- E.** Principal component analysis (PCA) of each spectra reveals separation between the three regions.

1

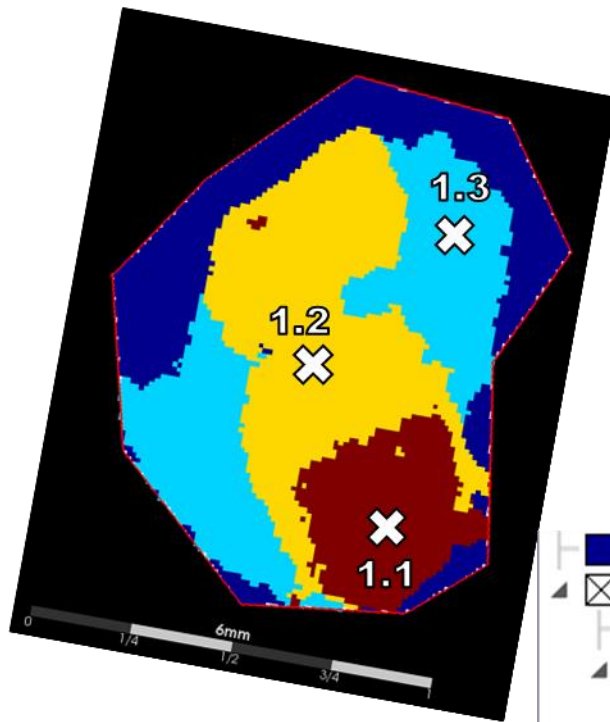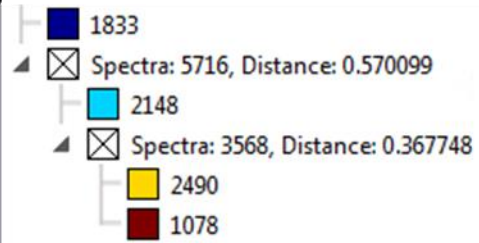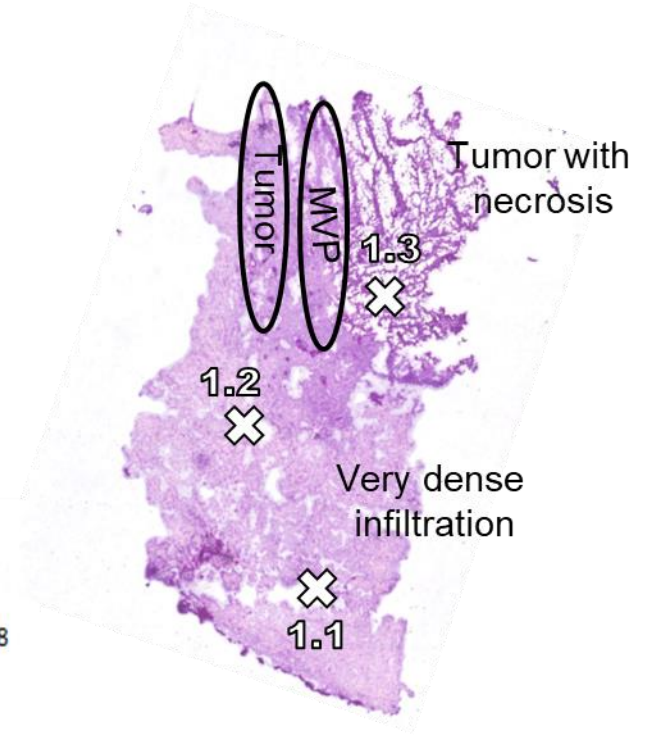

2

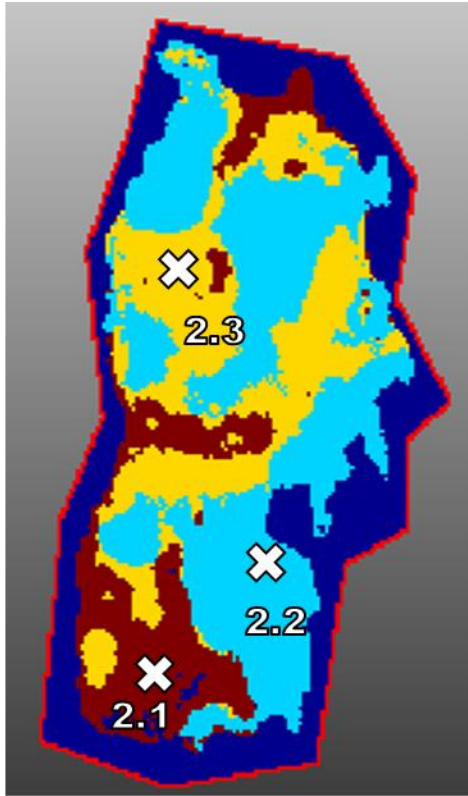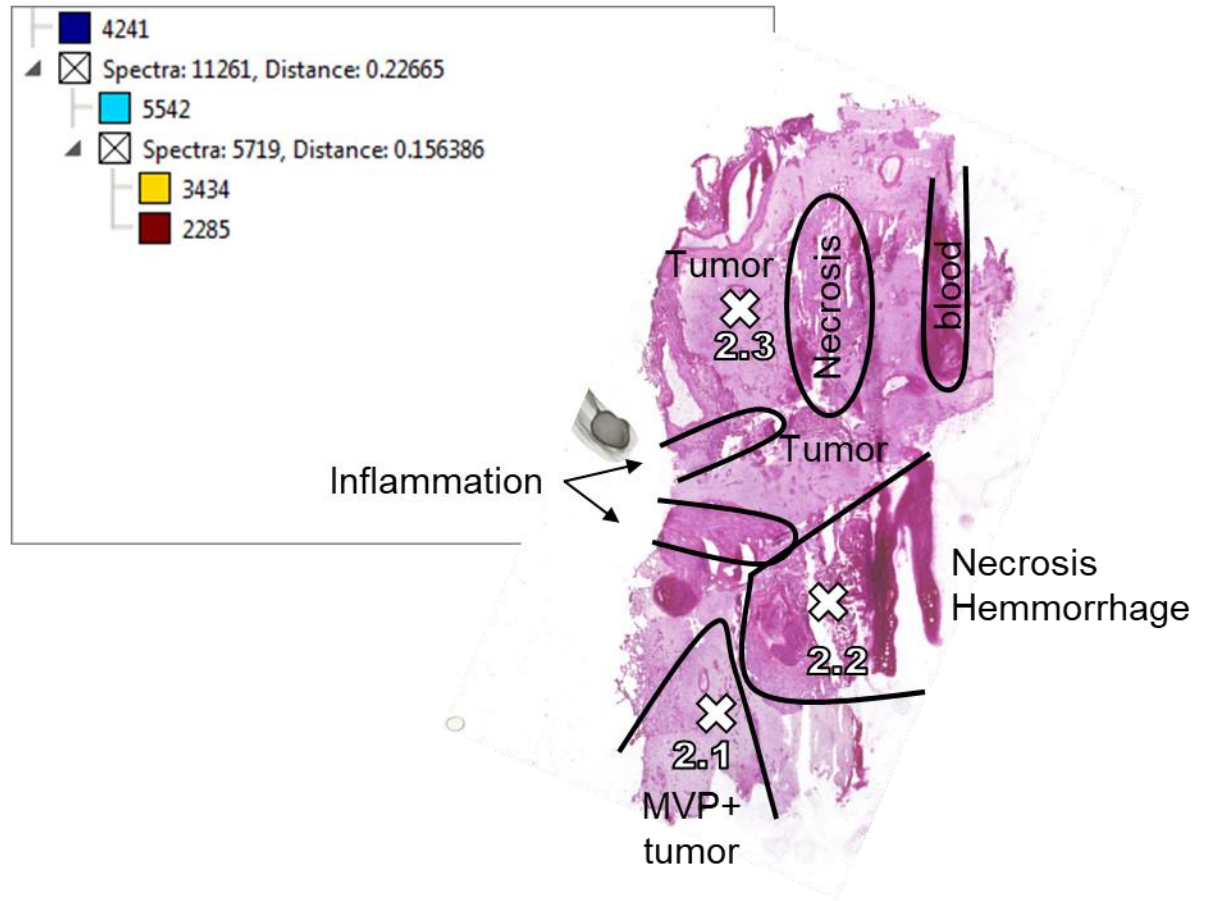

3

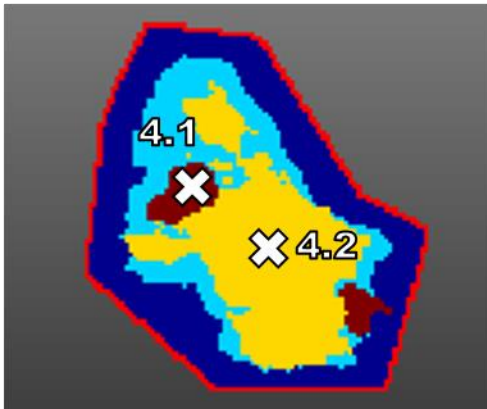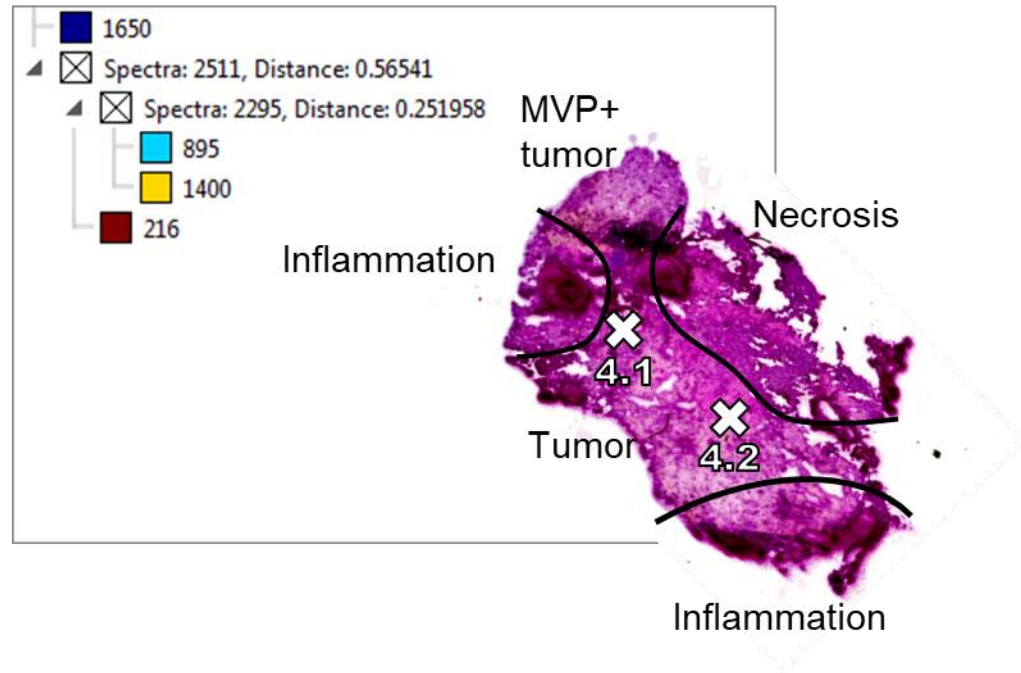

4

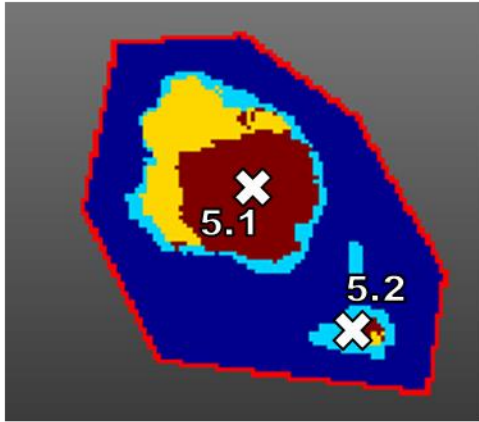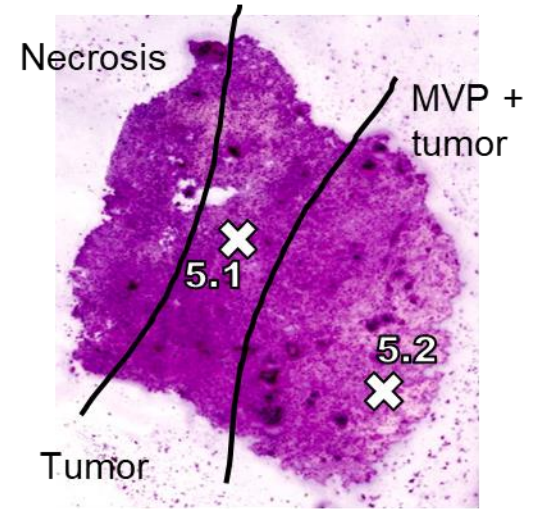

5

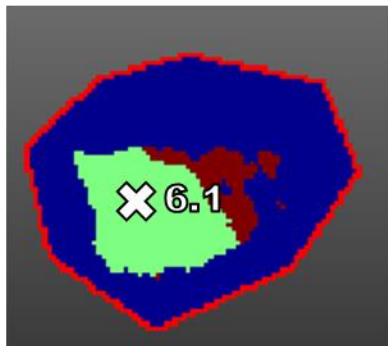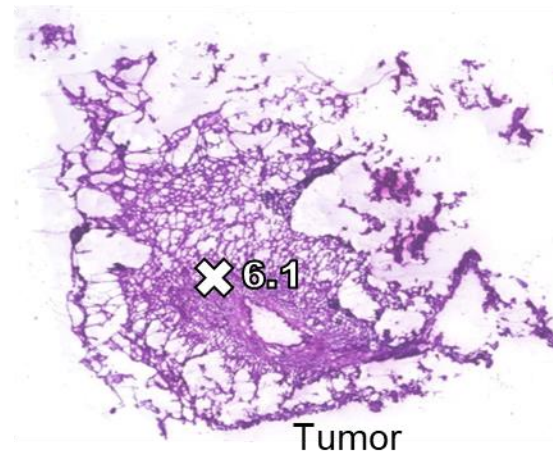

6

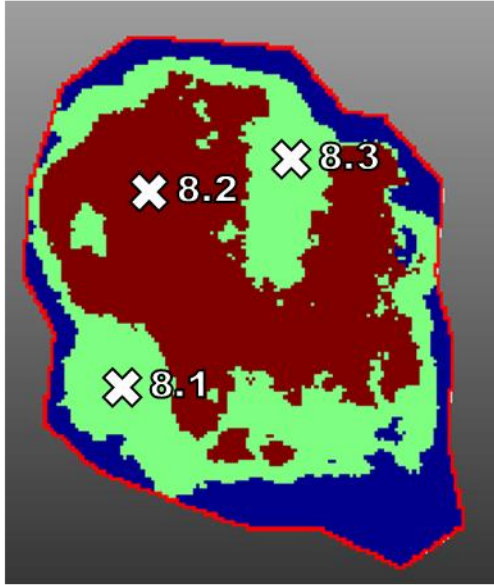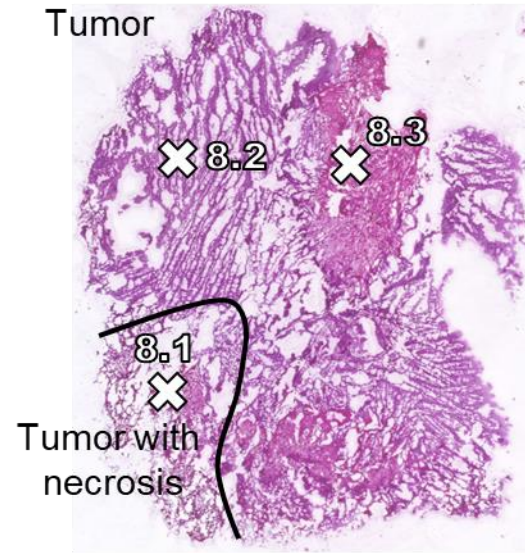

7

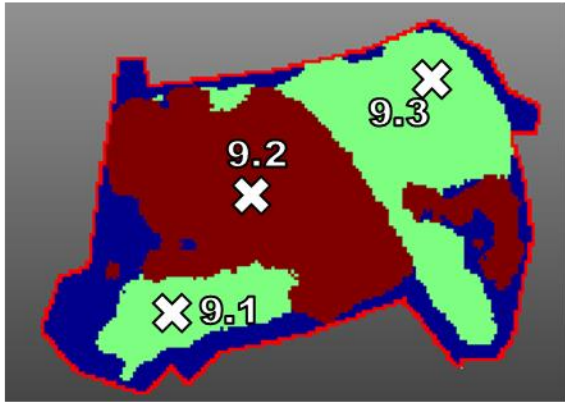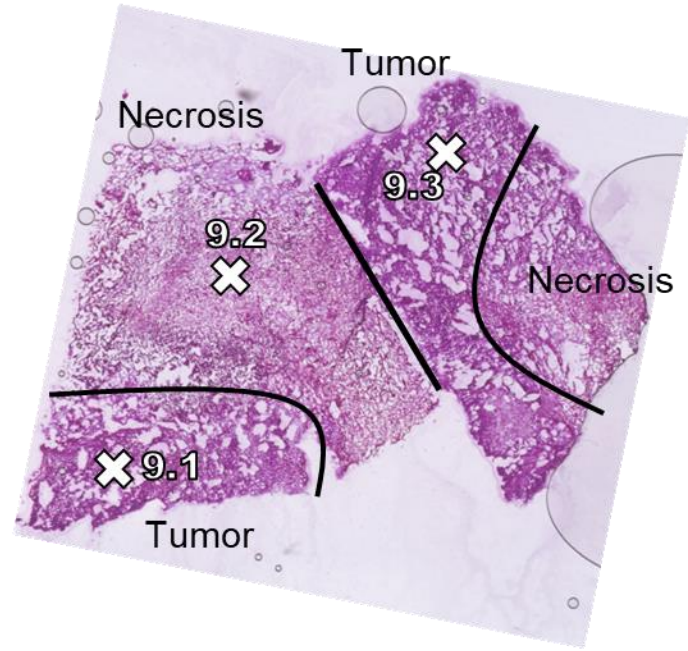

8

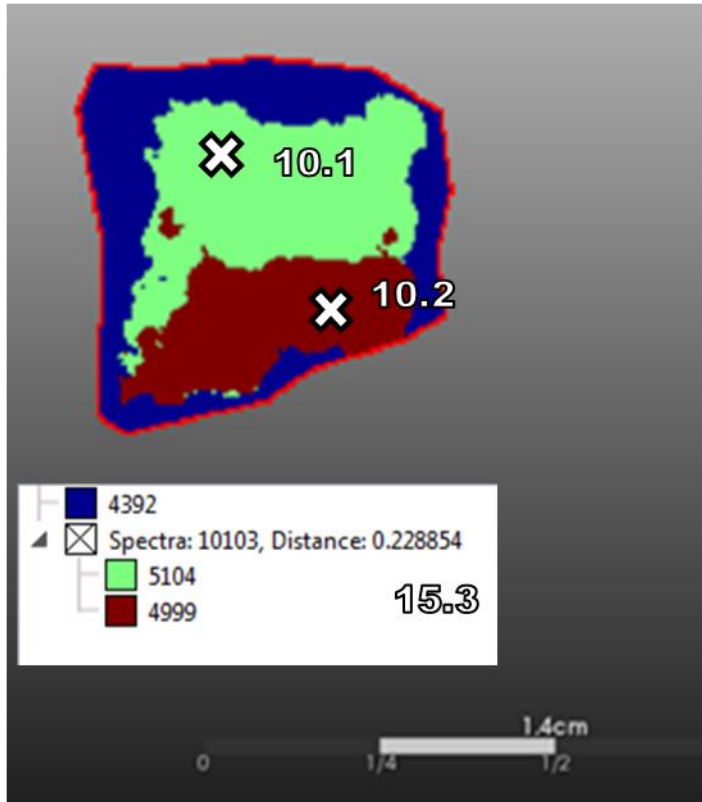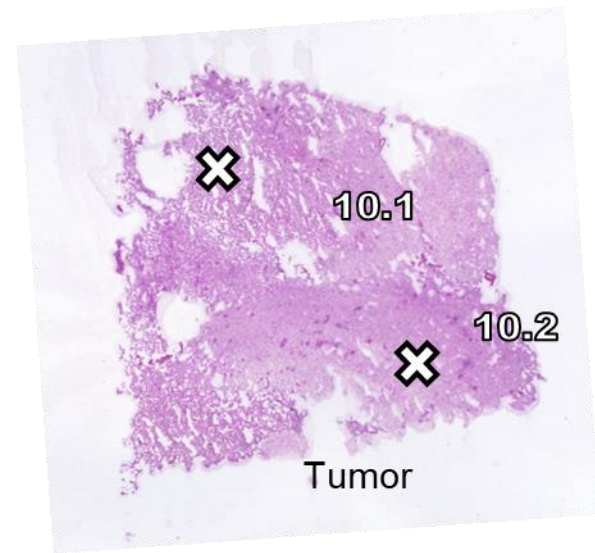



9

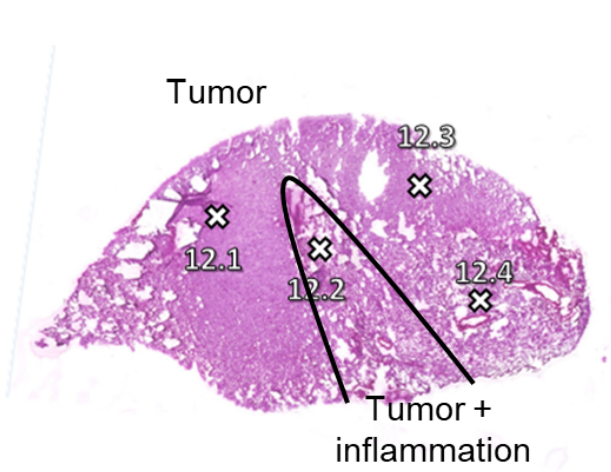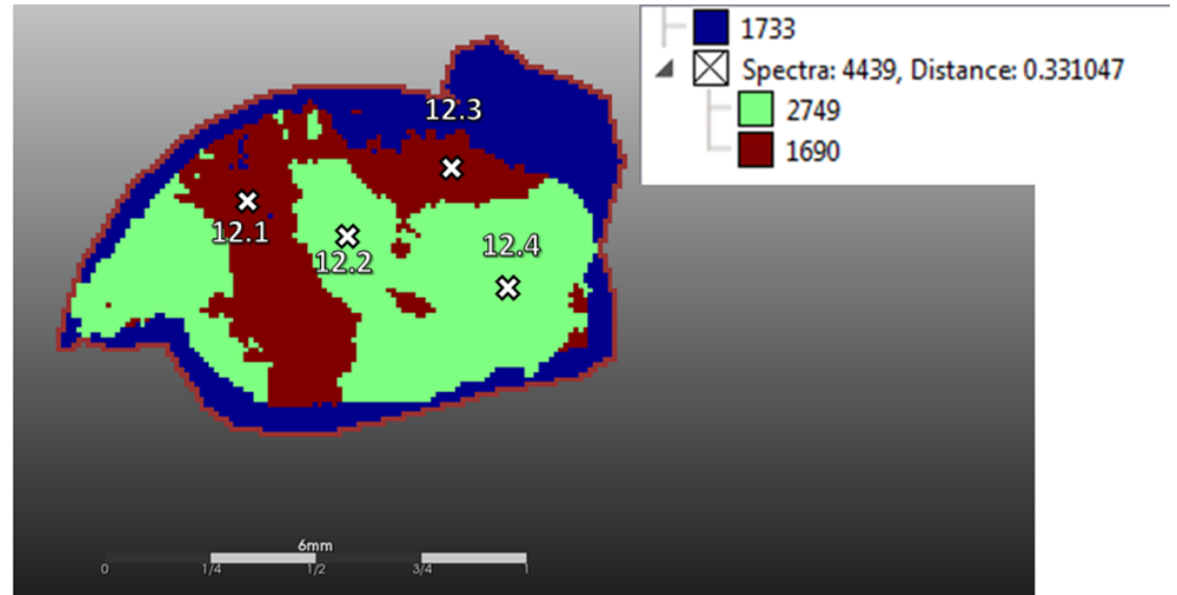

10

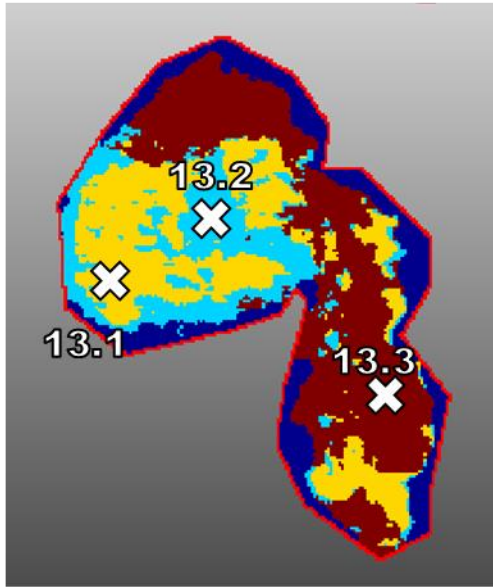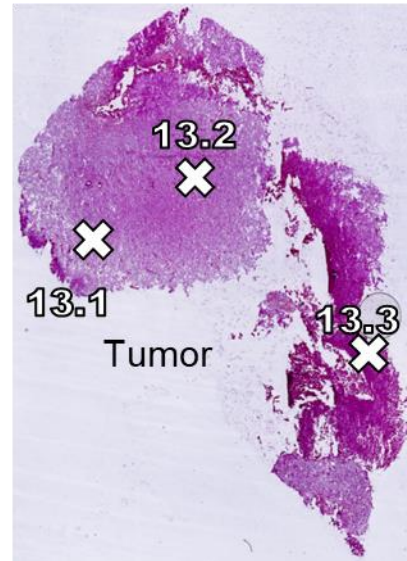

11

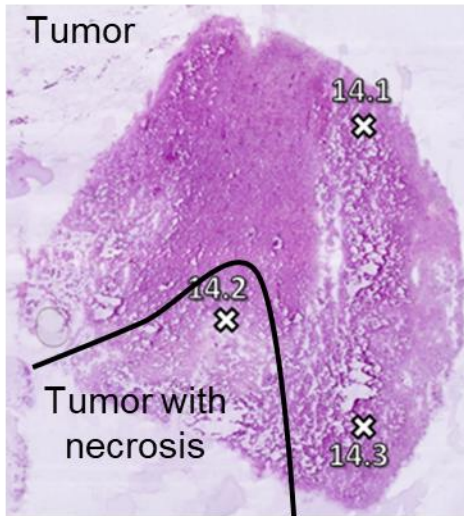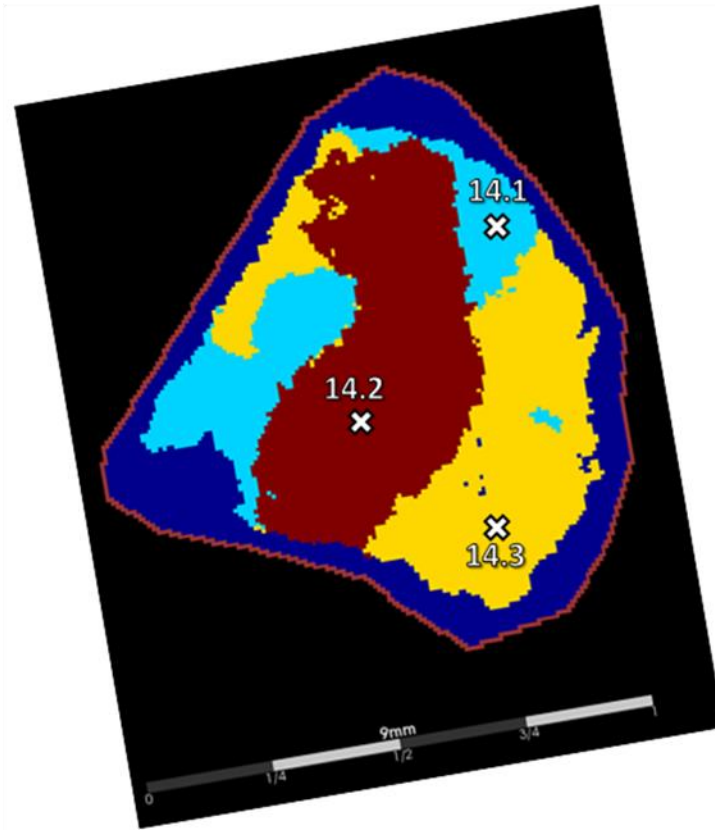

12

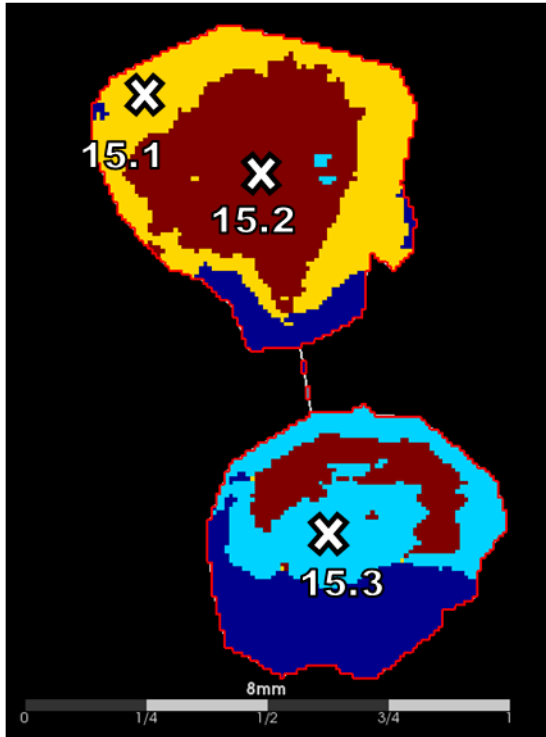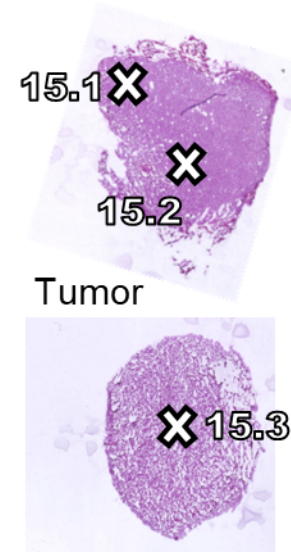

13

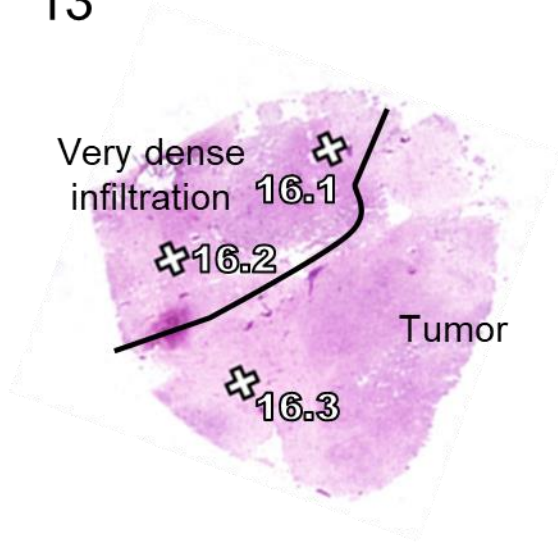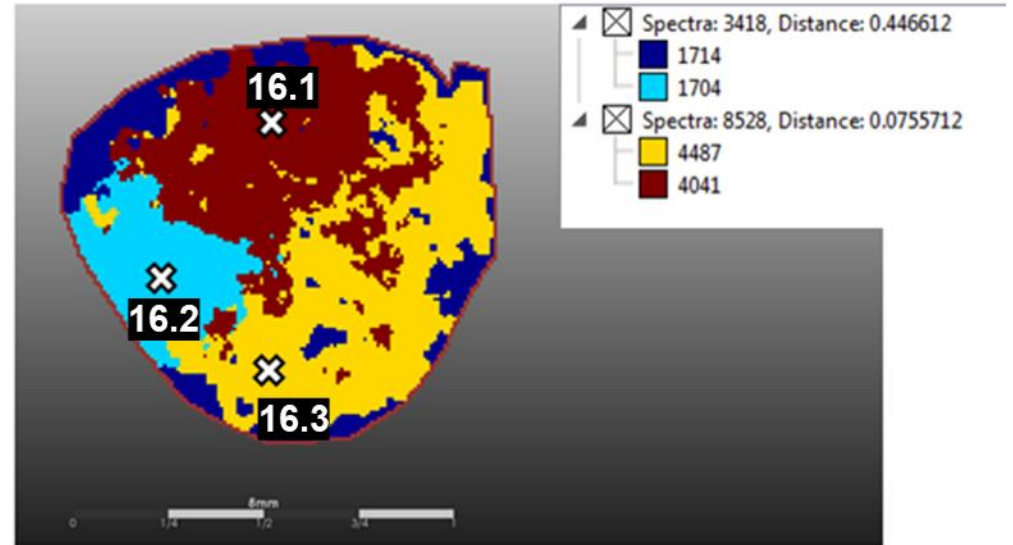

14

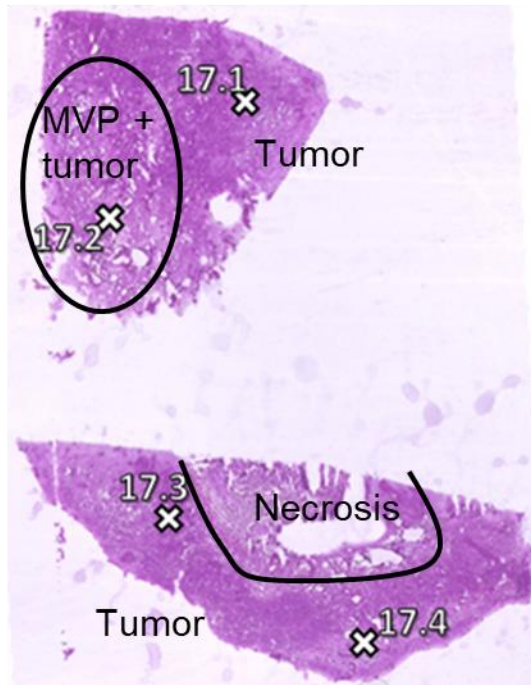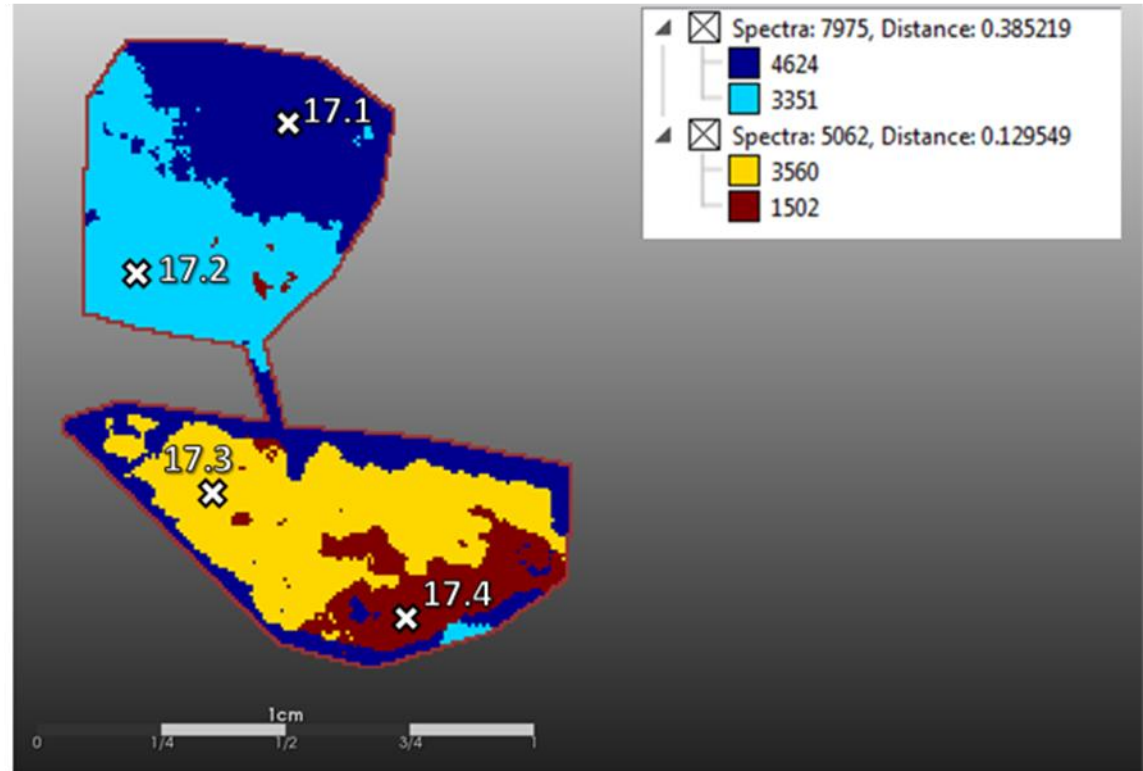

15

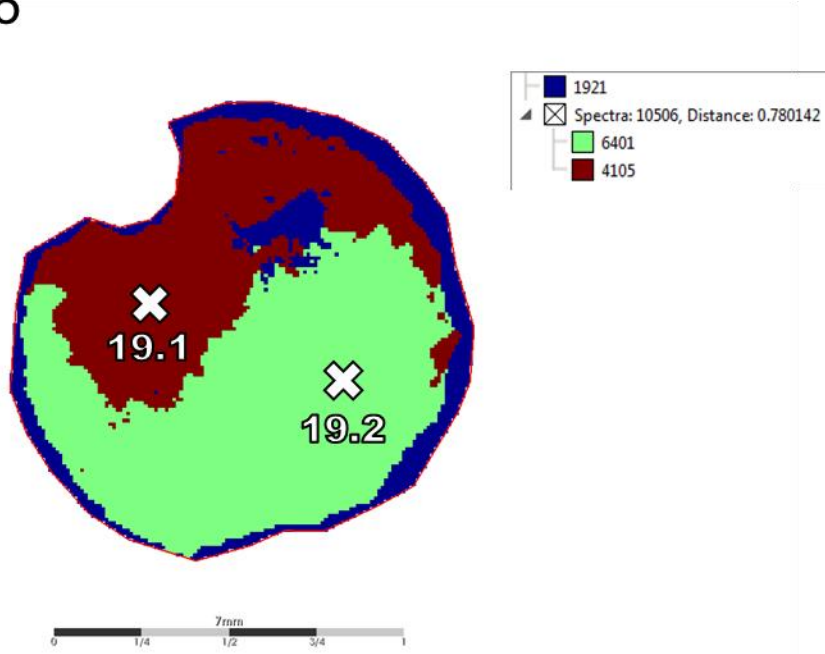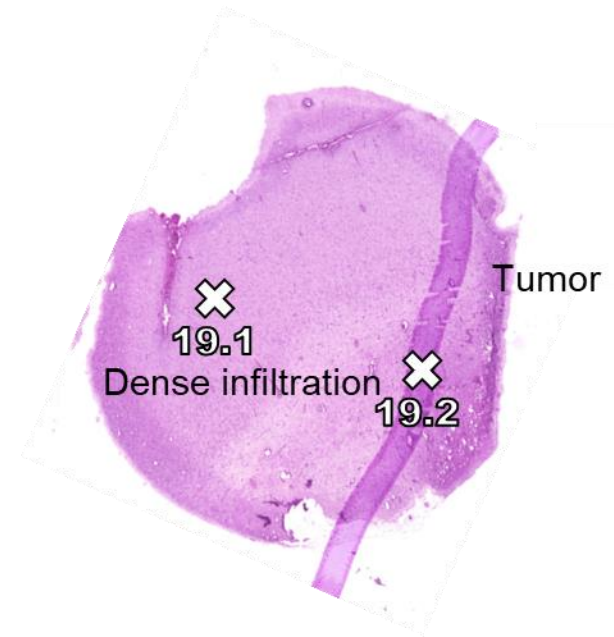

16

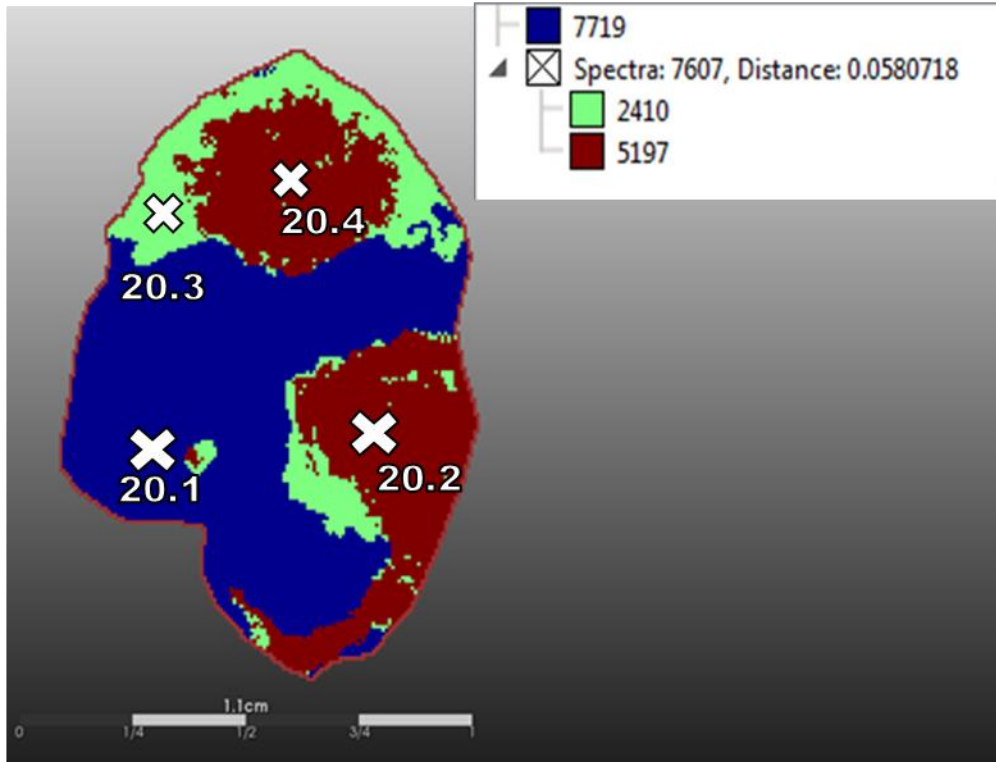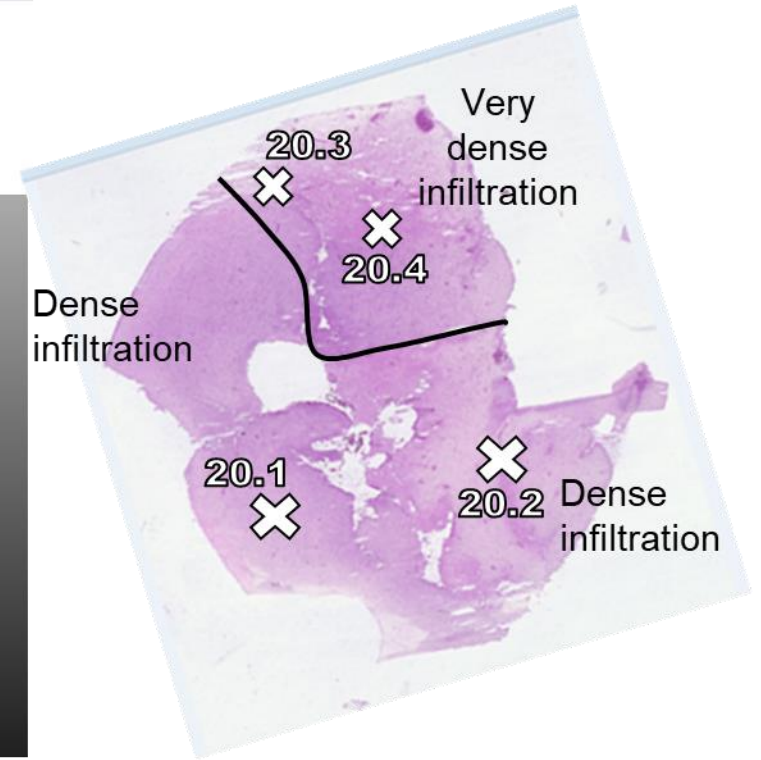



17

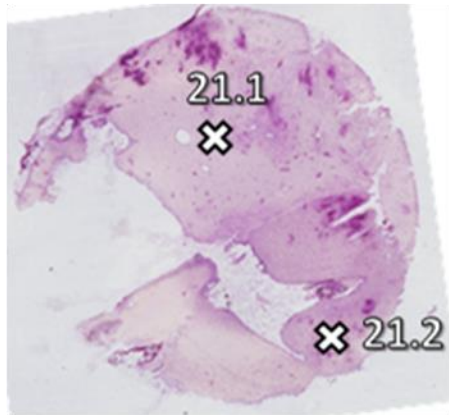

Dense infiltration

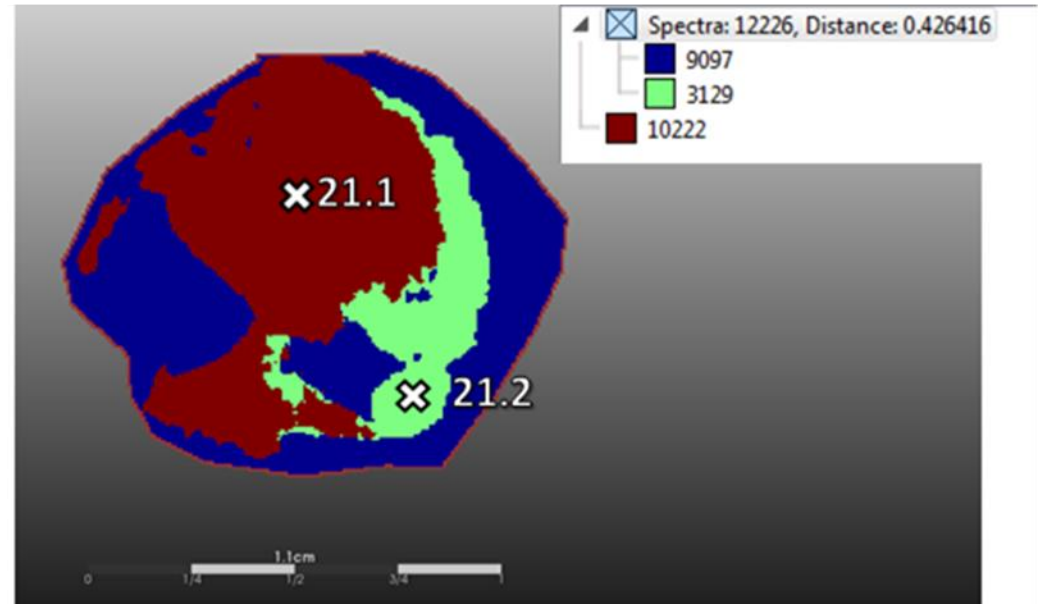

18

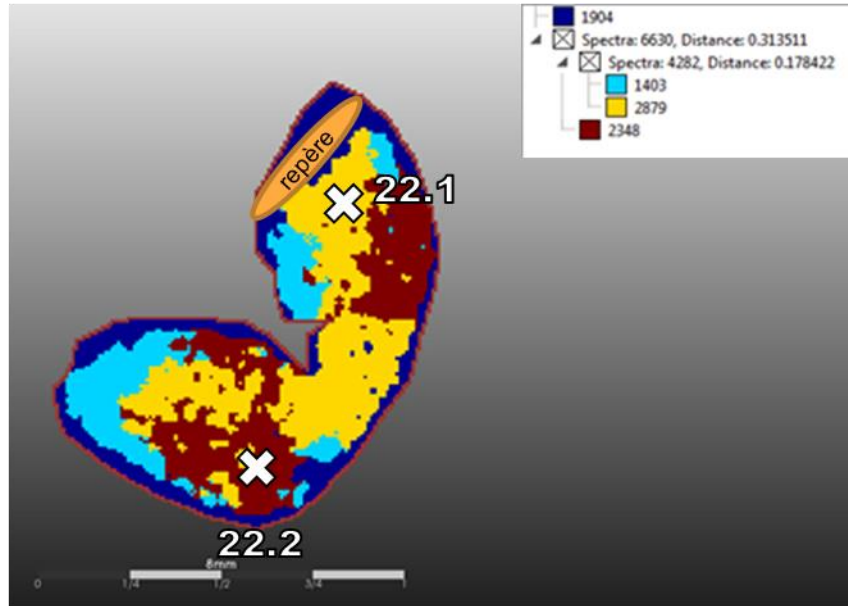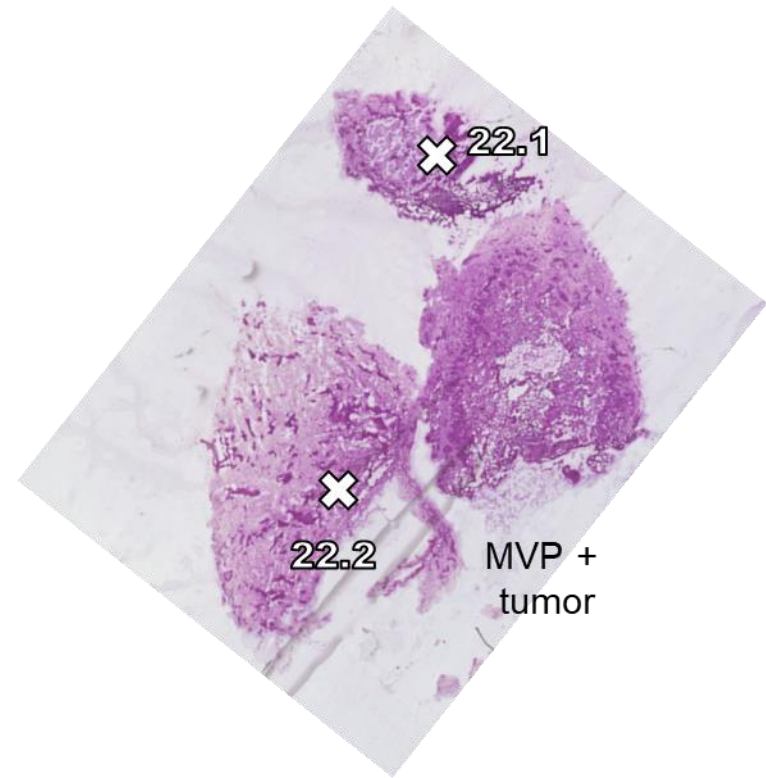

19

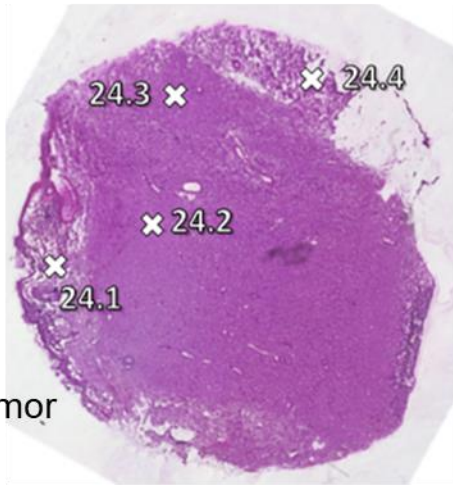

Tumor

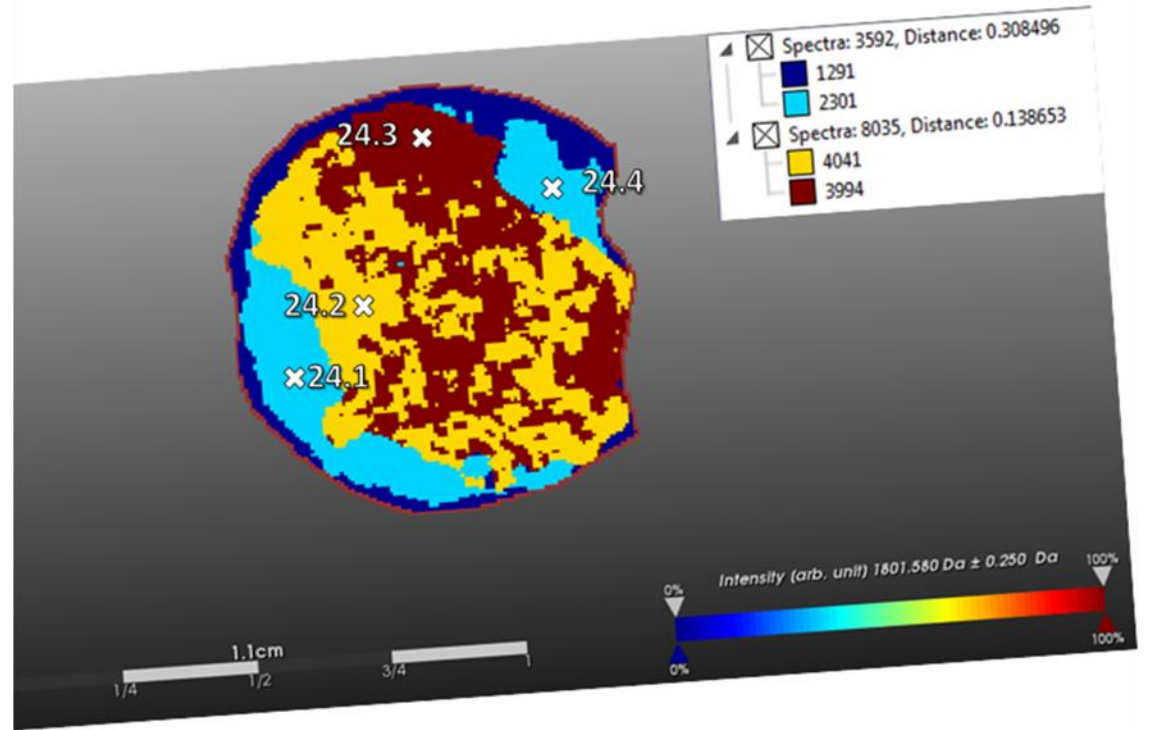

20

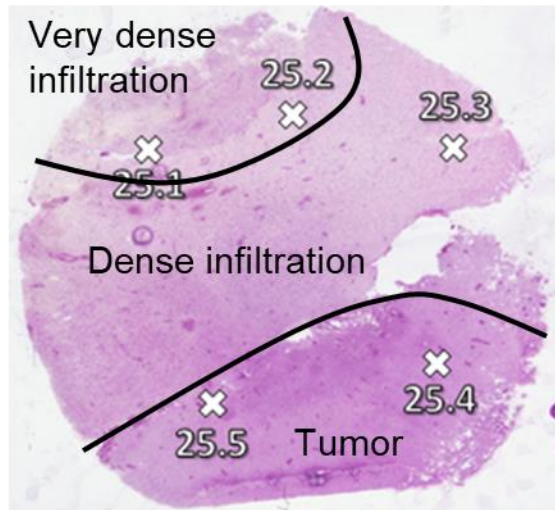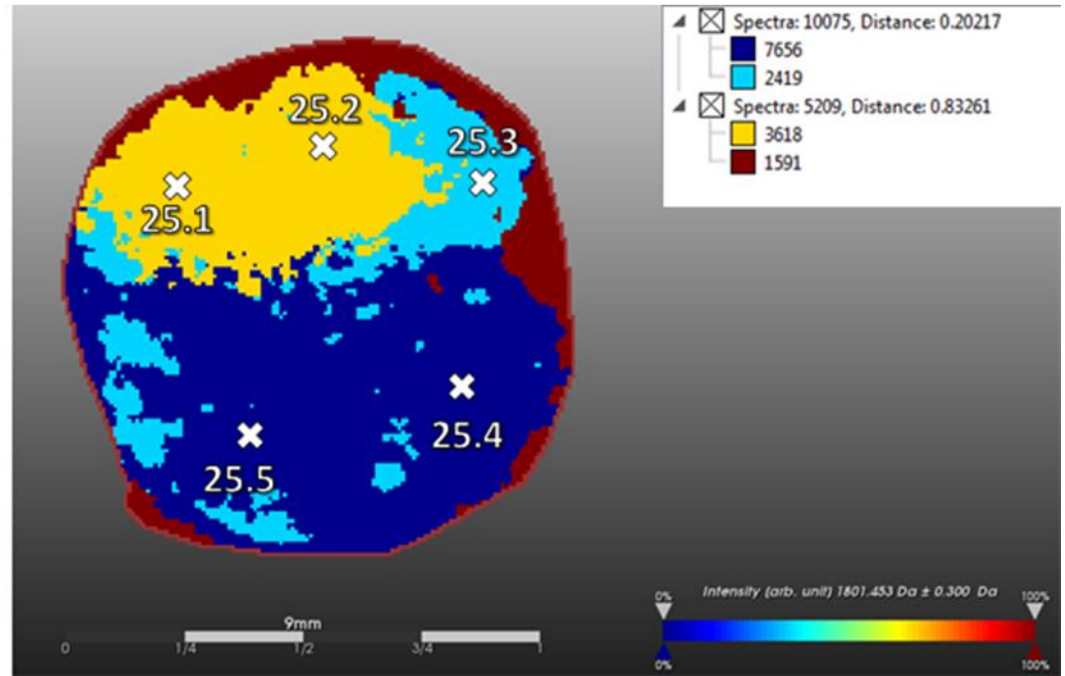

21

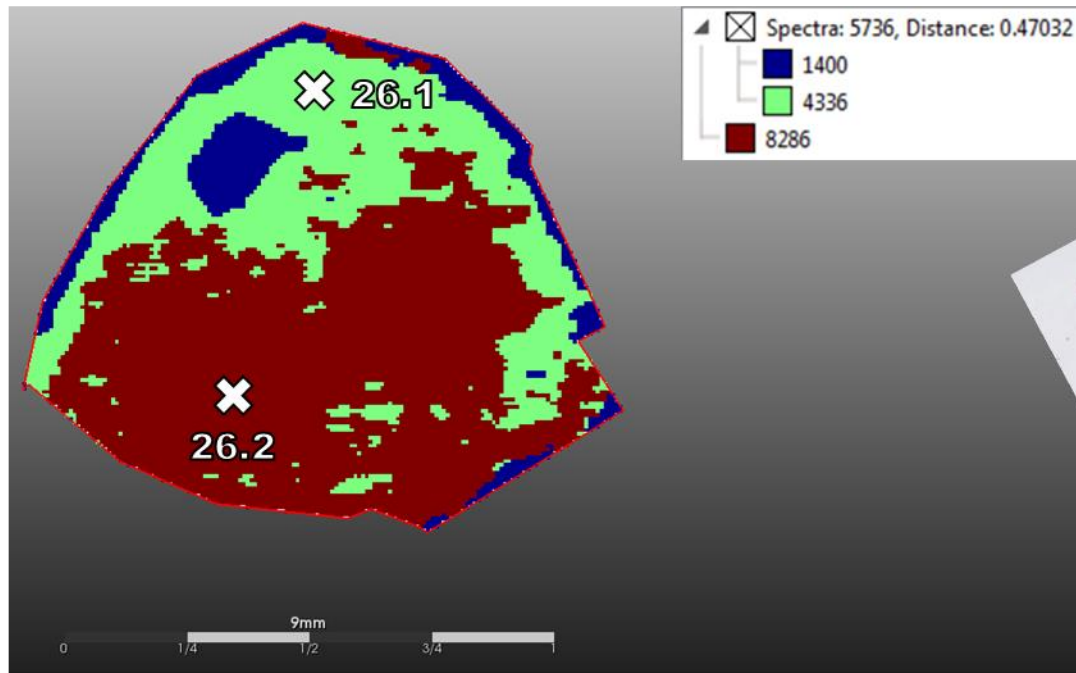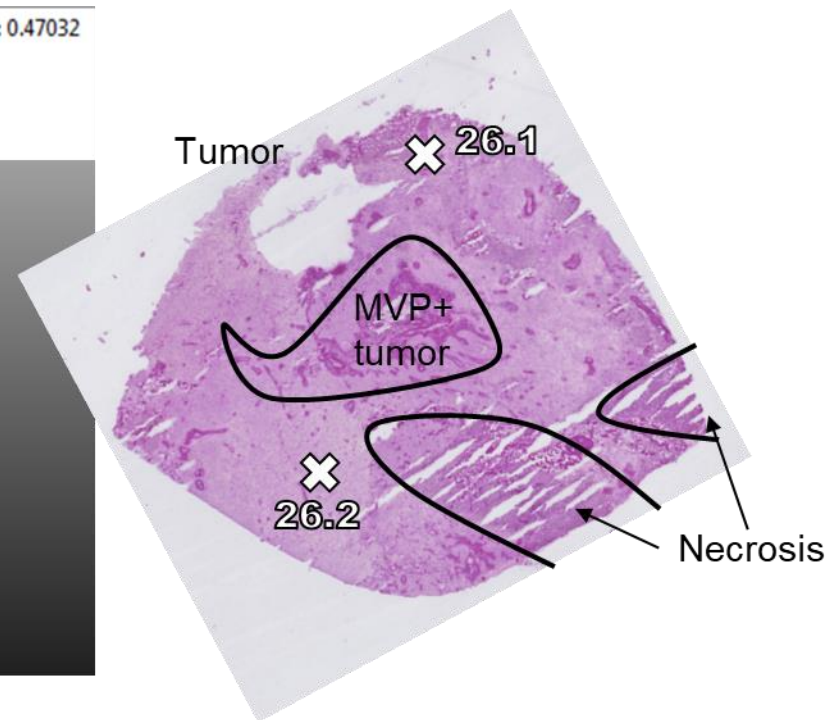

22

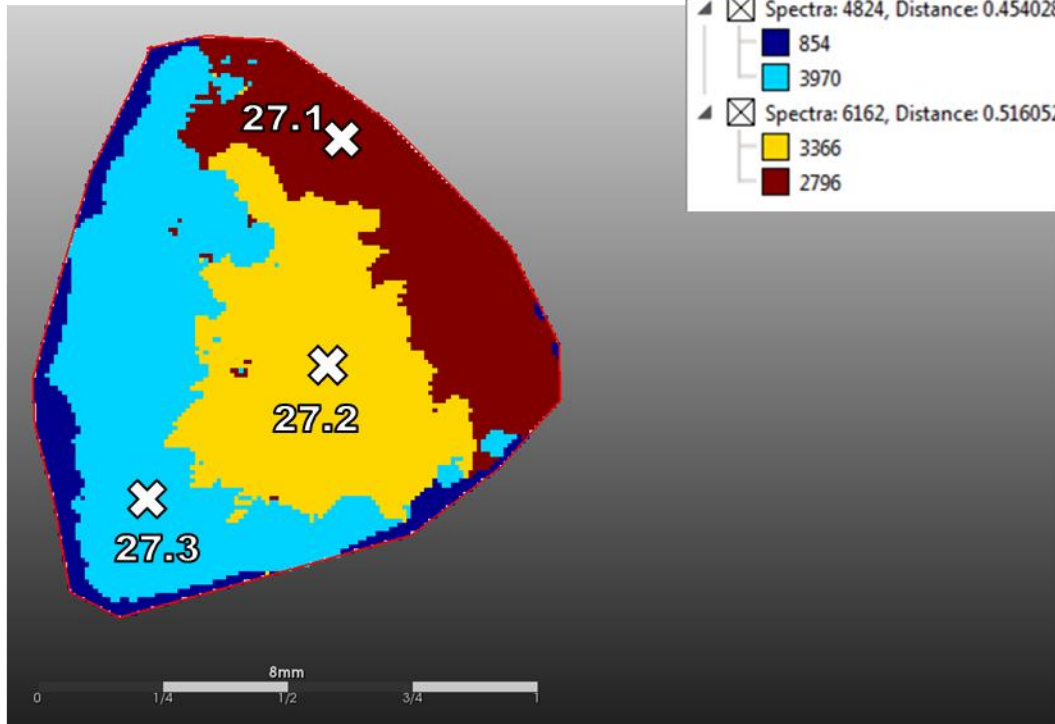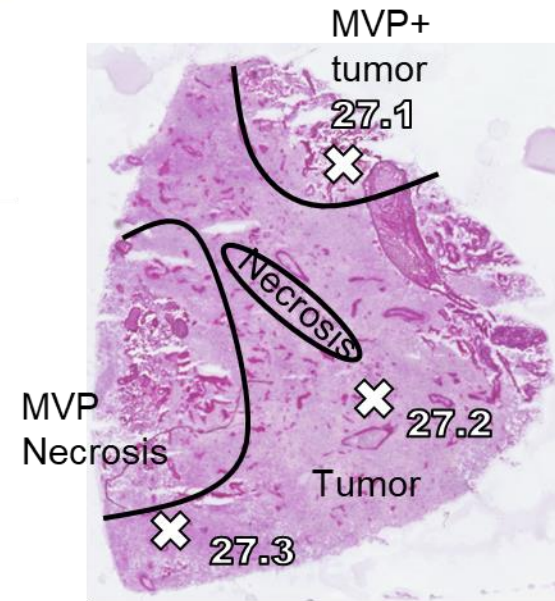

23

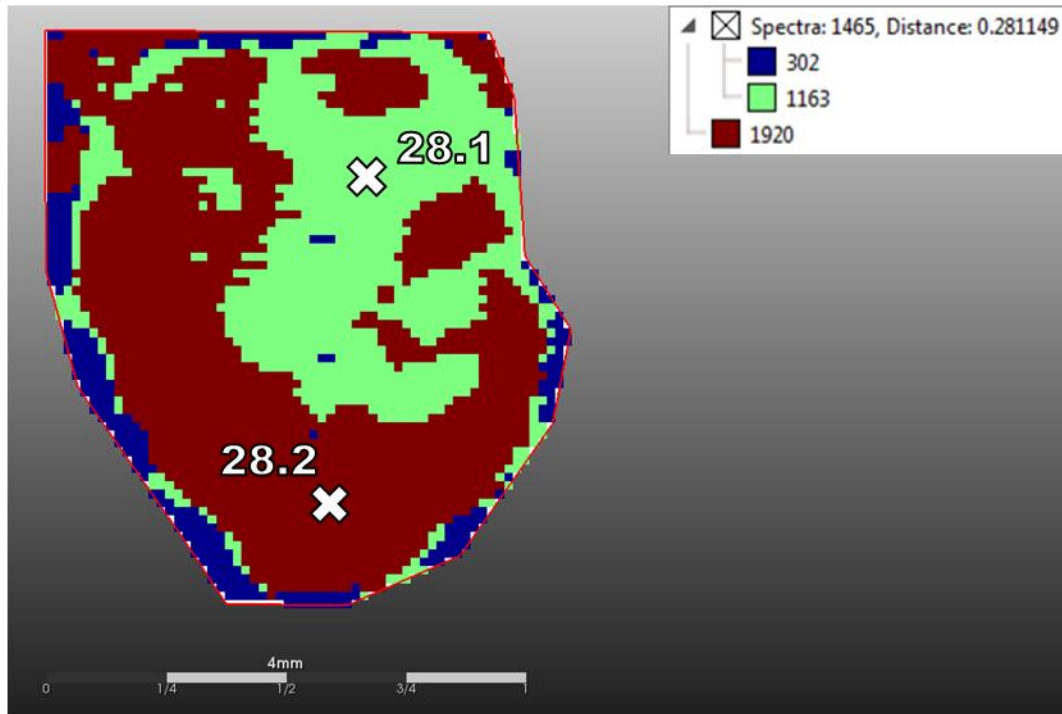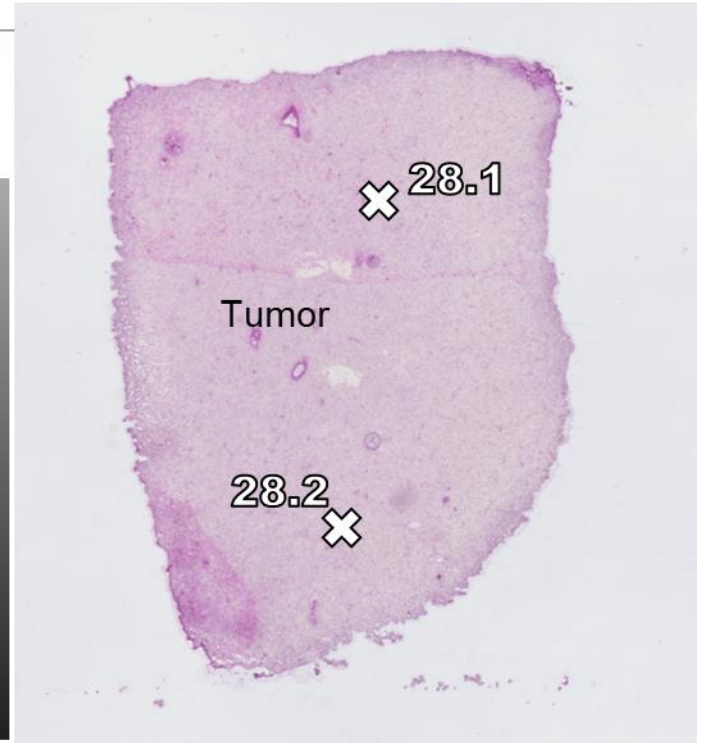

24

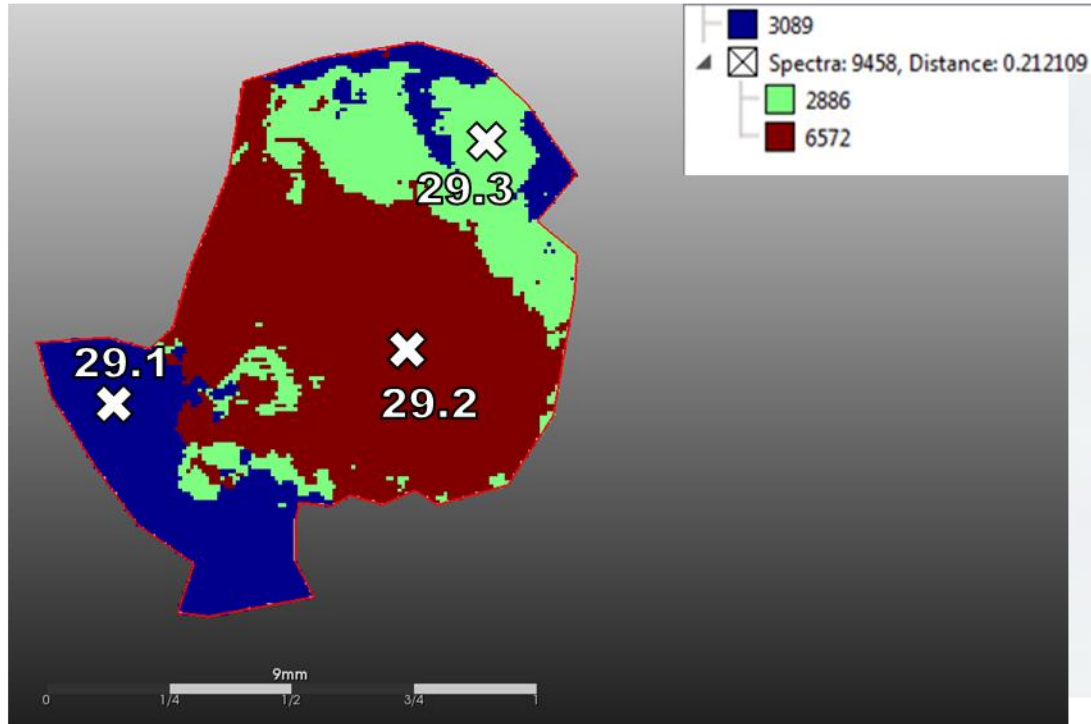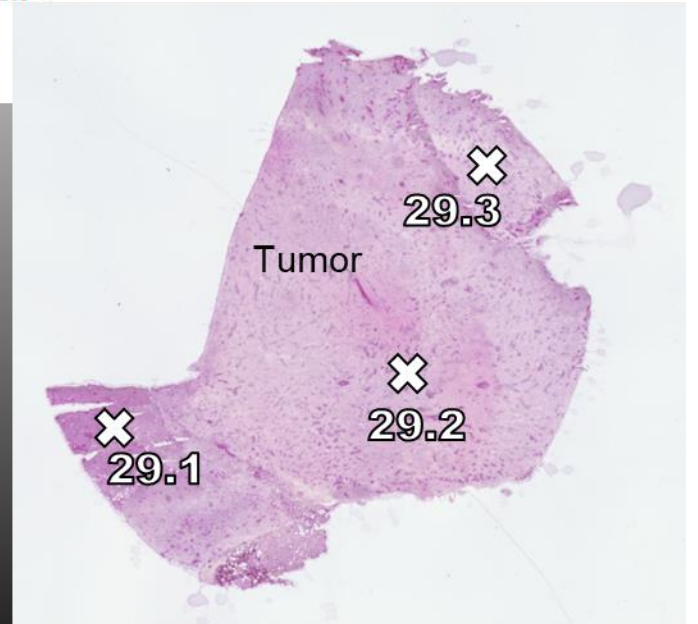



25

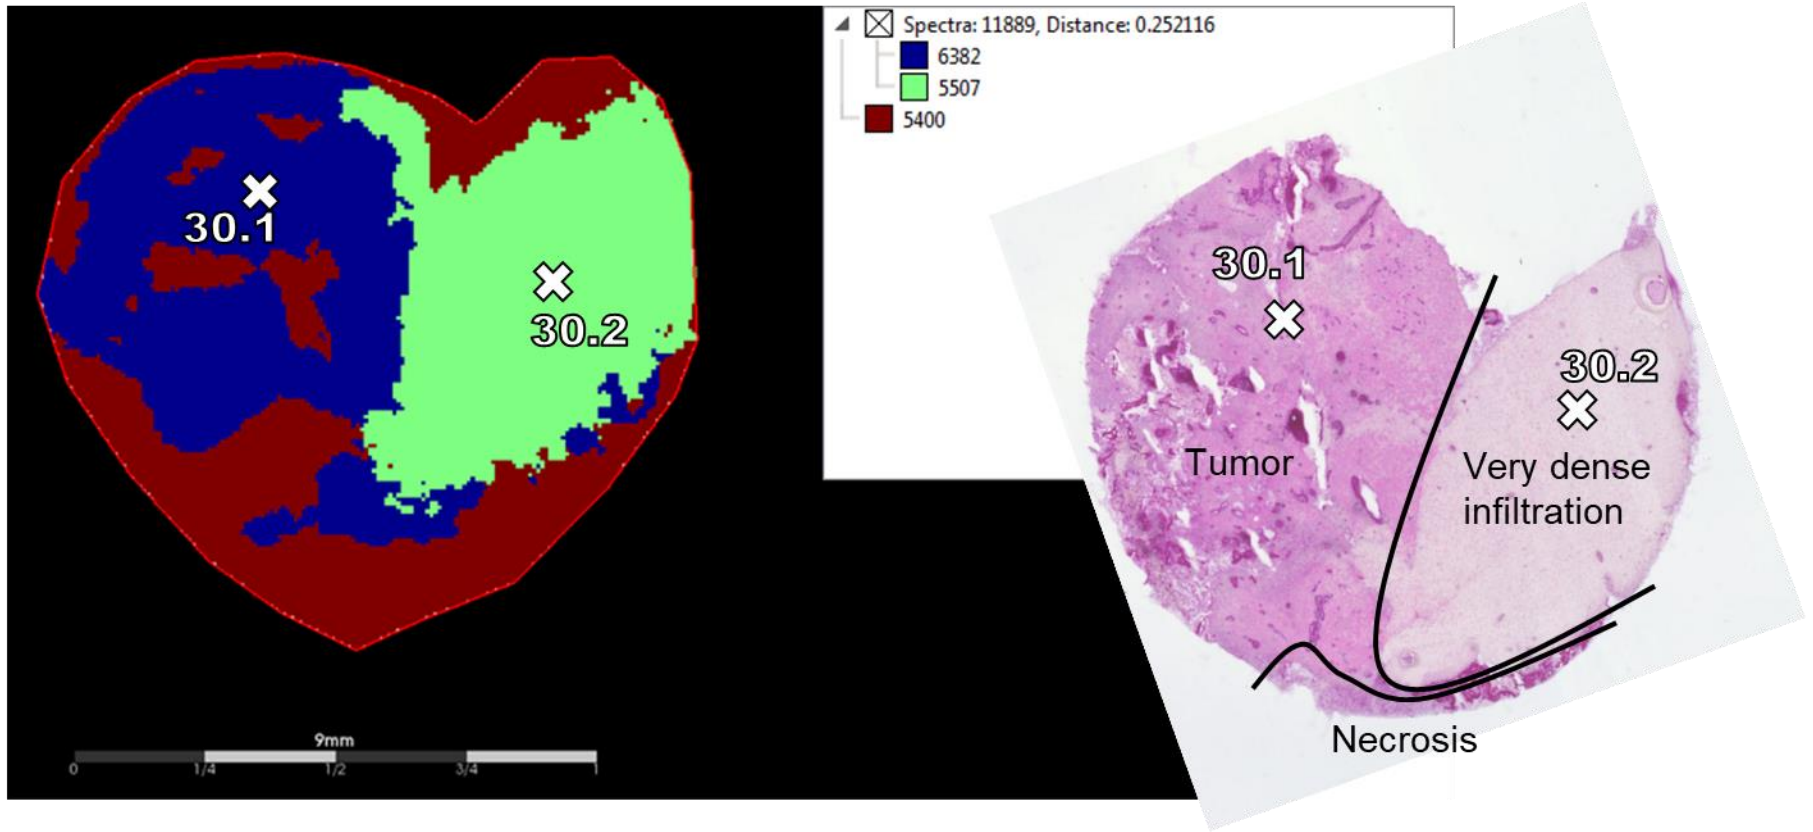

26

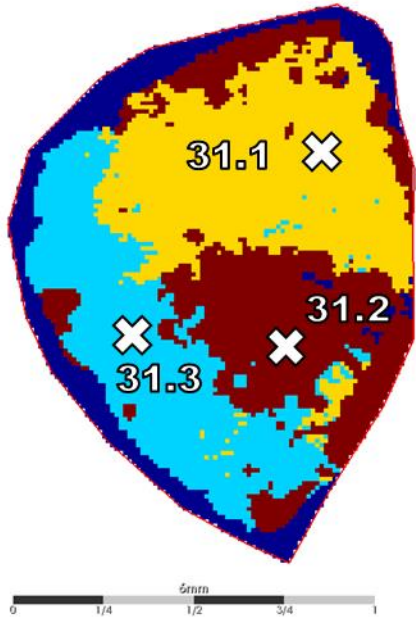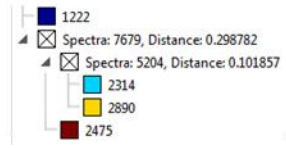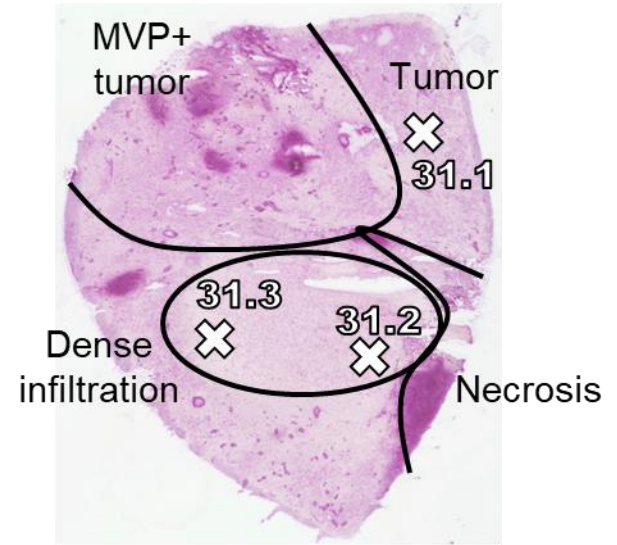

27

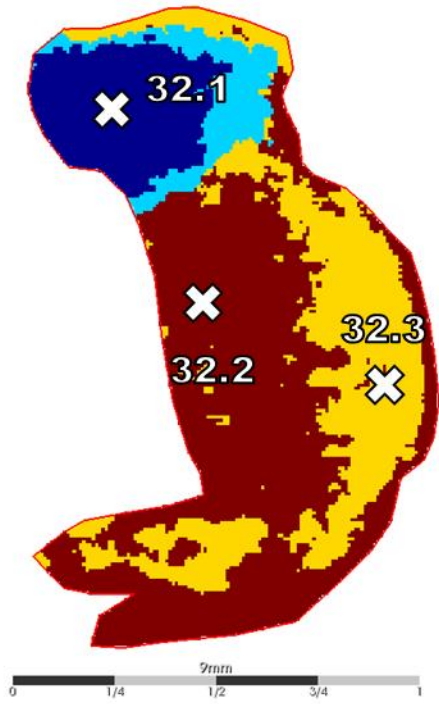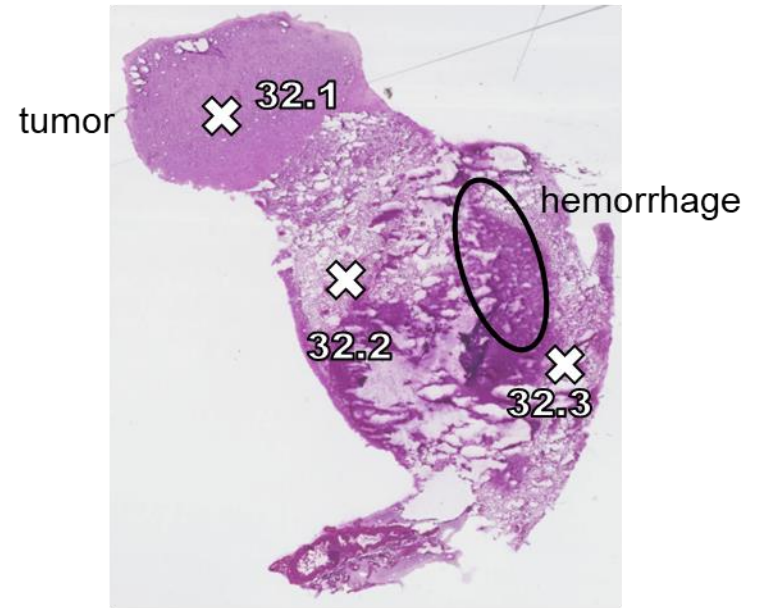

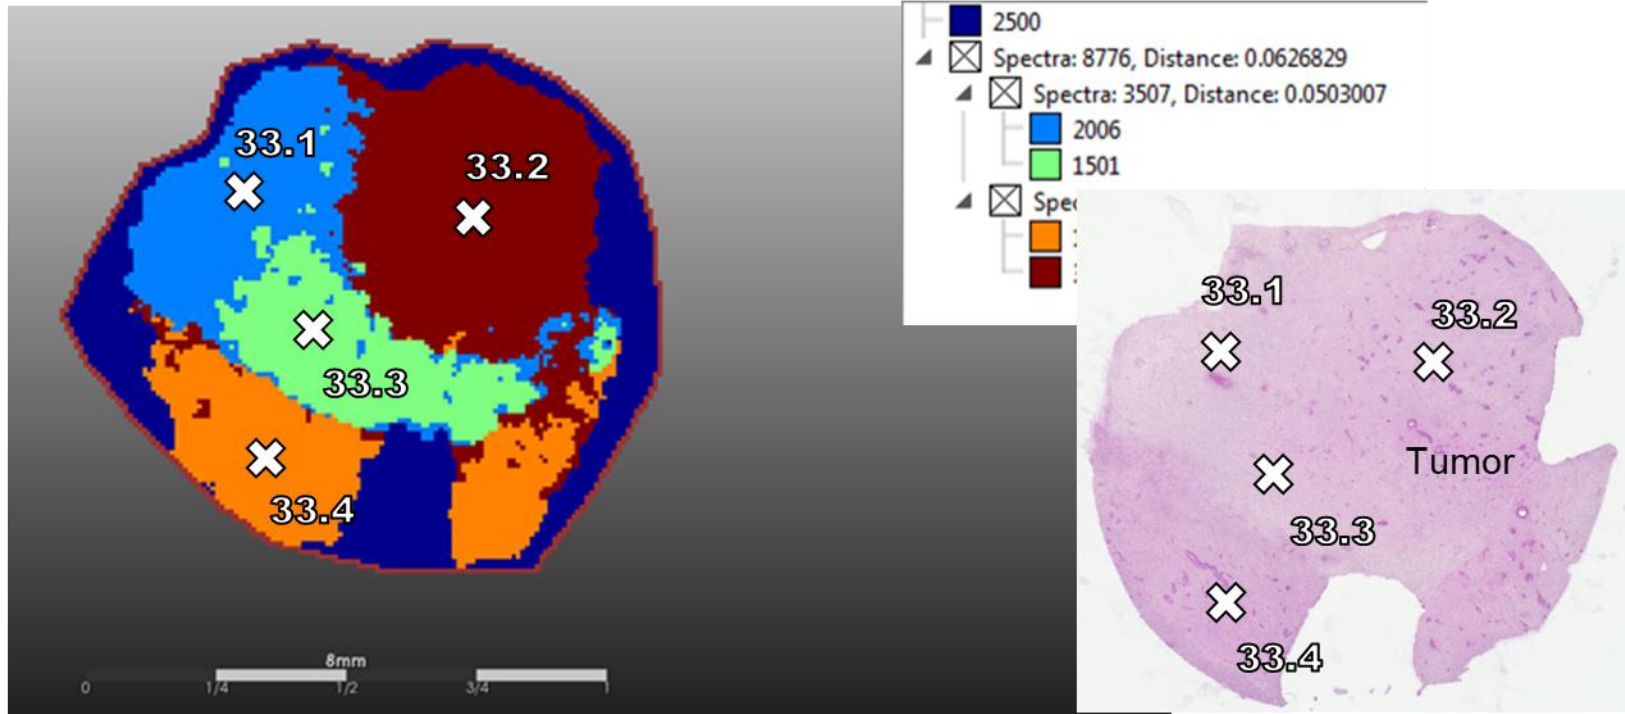

29

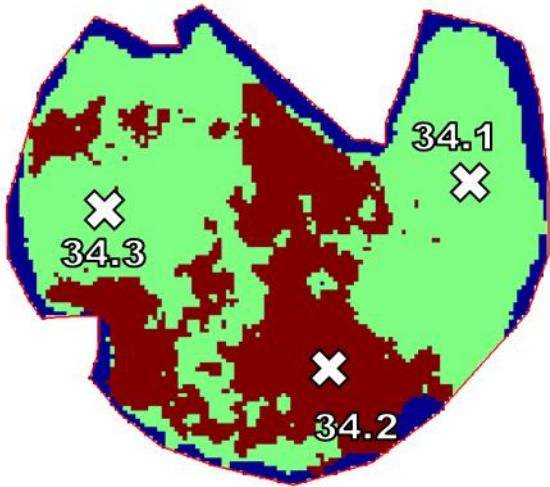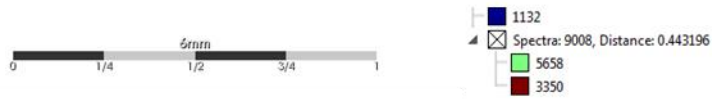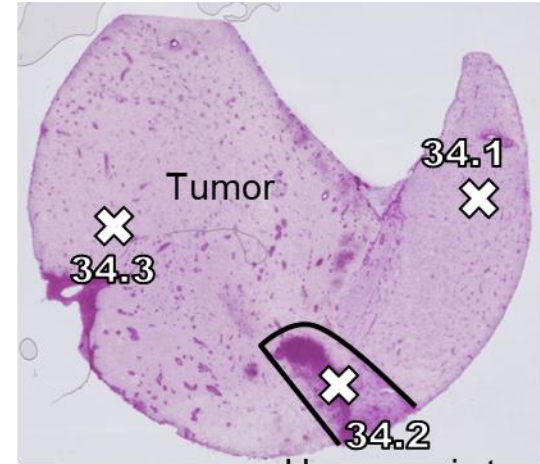

Tumor

Hemorrhagic tumor

30

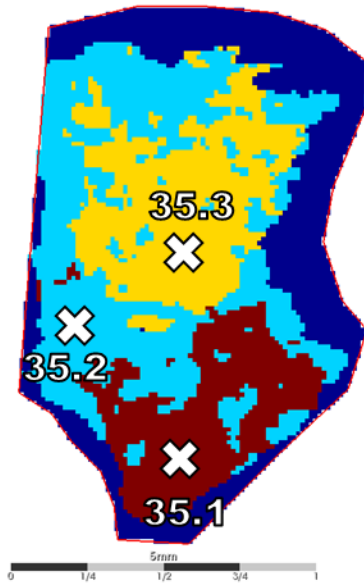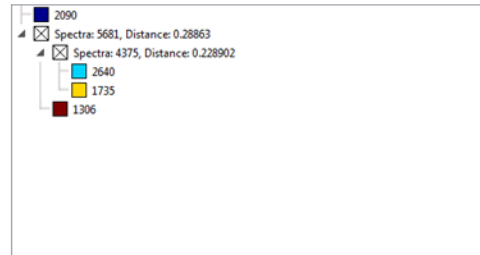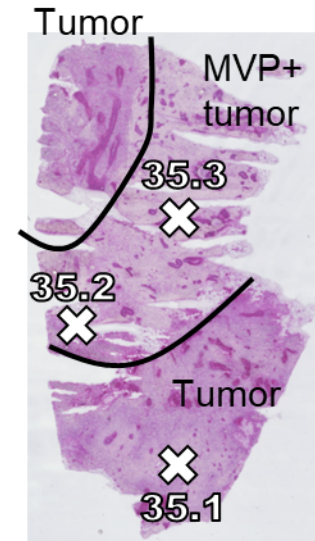

31

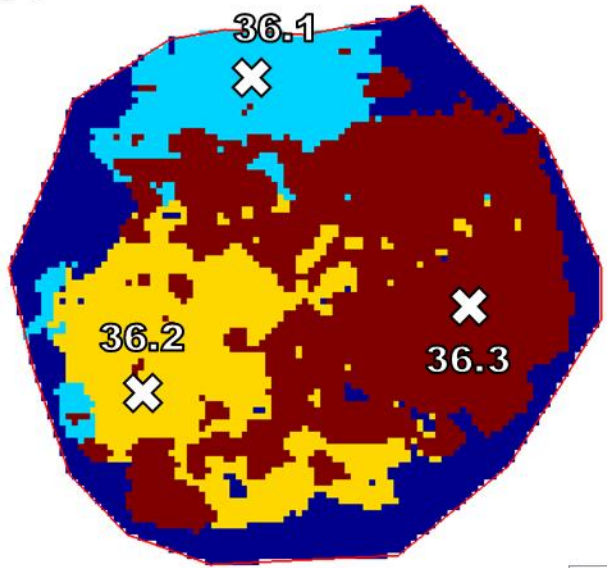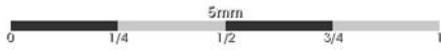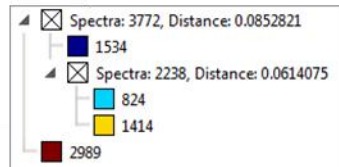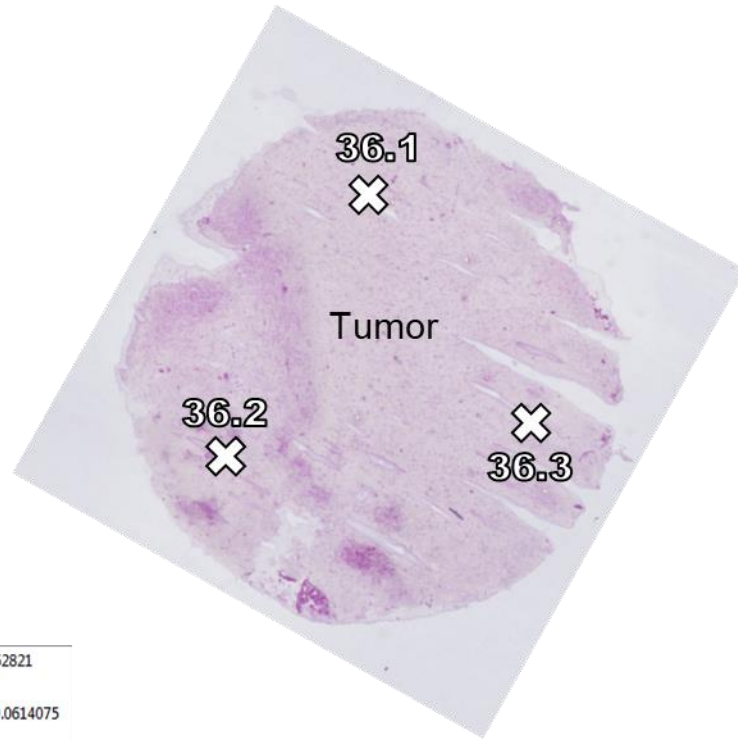

32

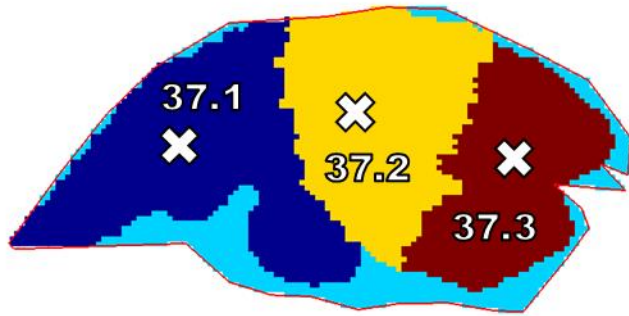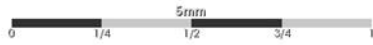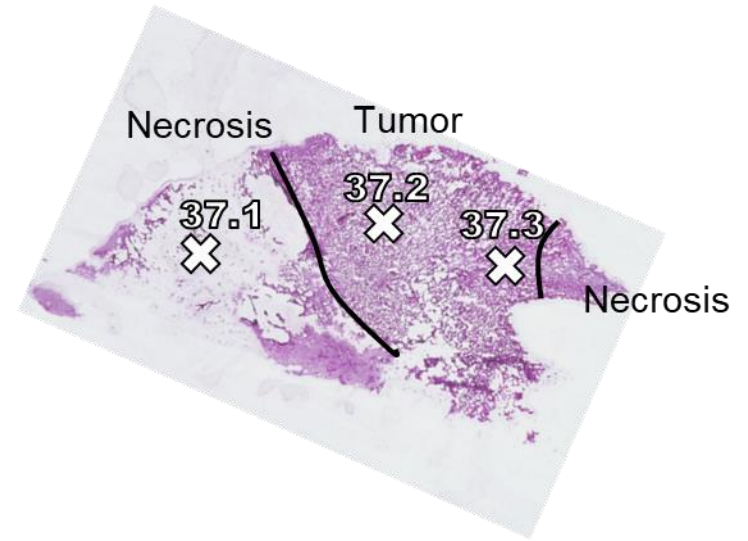



33

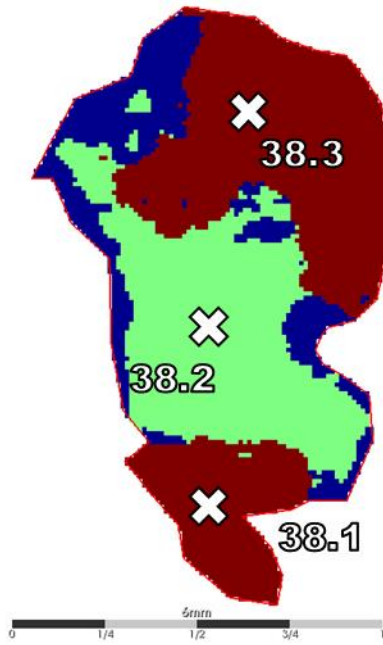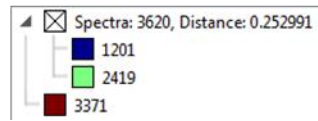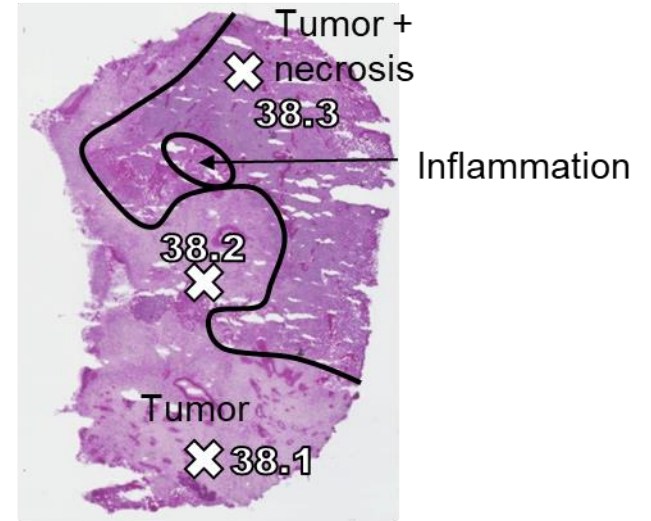

34

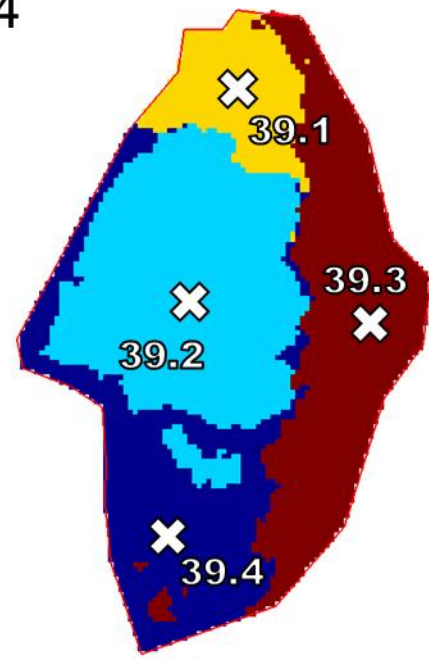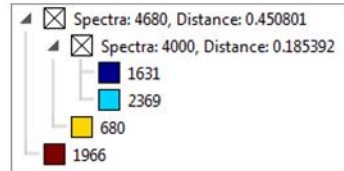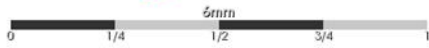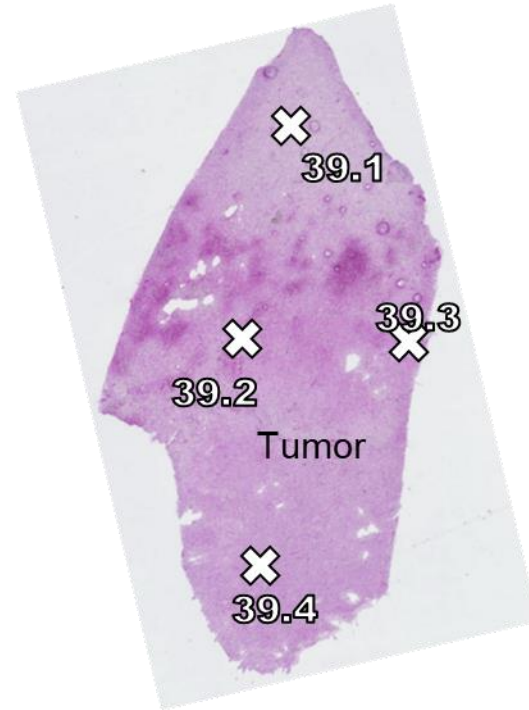

35

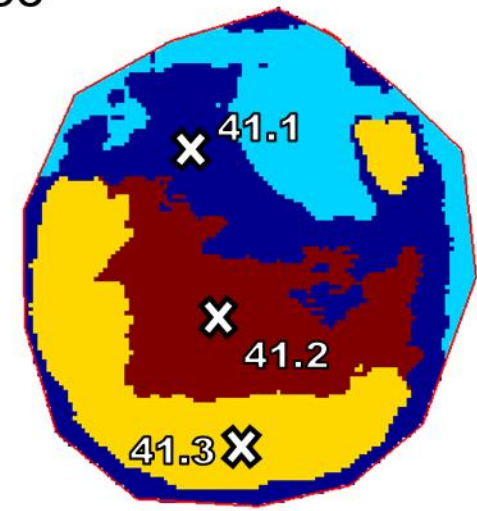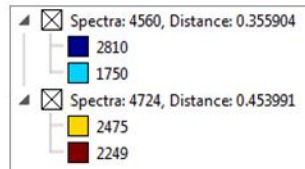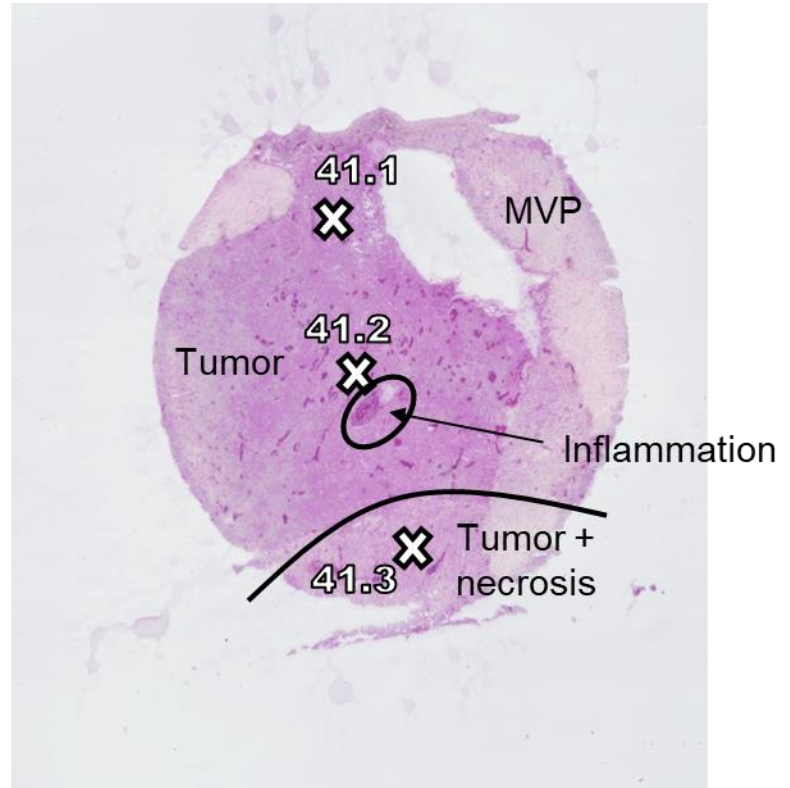

36

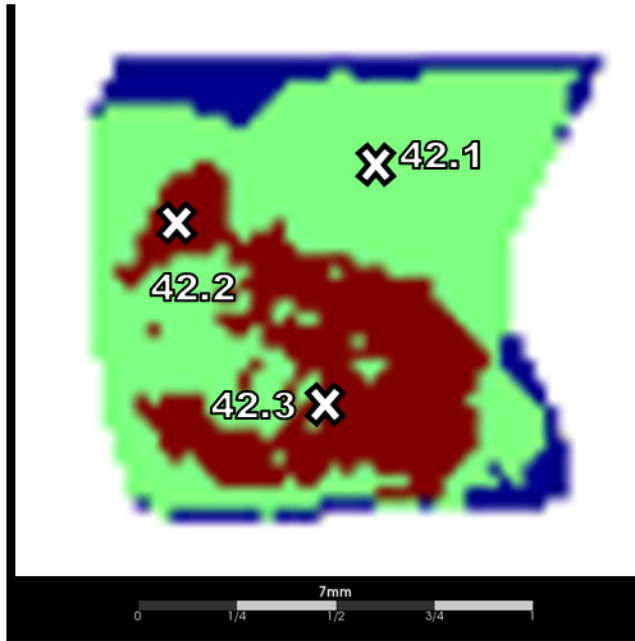

- ☒ Spectra: 7707, Distance: 0.72712
- ☒ Spectra: 5626, Distance: 0.243224
  - 2425
  - 3201
  - 2081
- ☒ Spectra: 5564, Distance: 0.142983
  - 1980
  - 3584

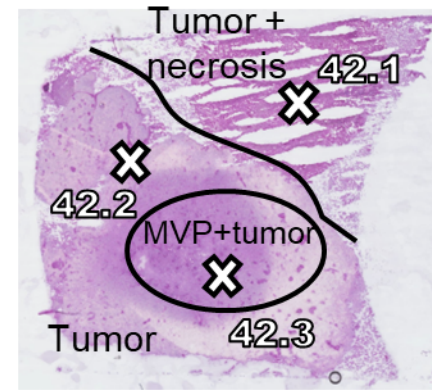

37

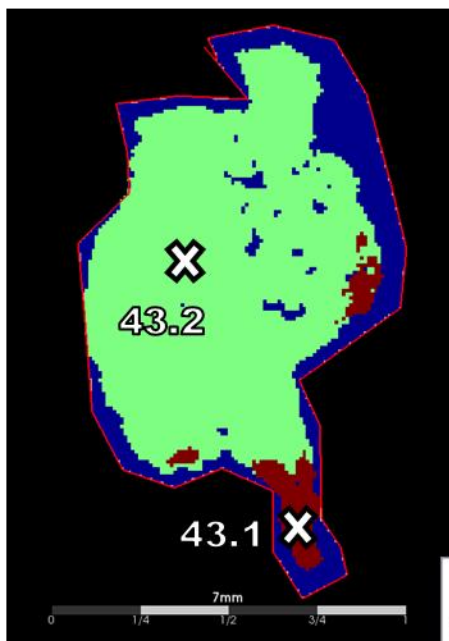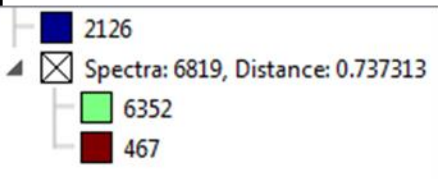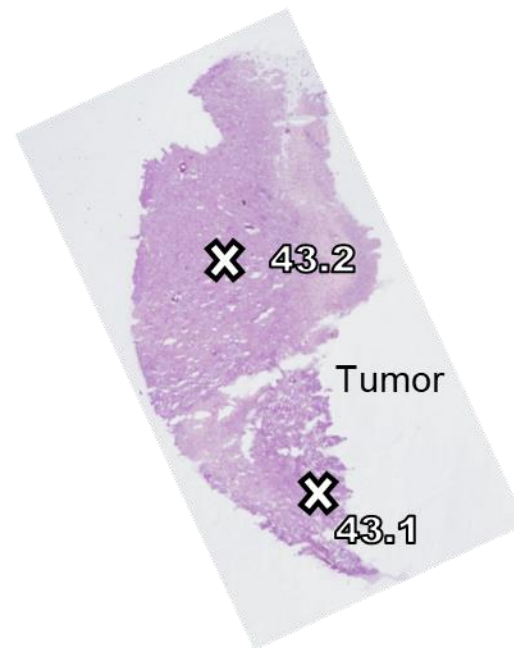

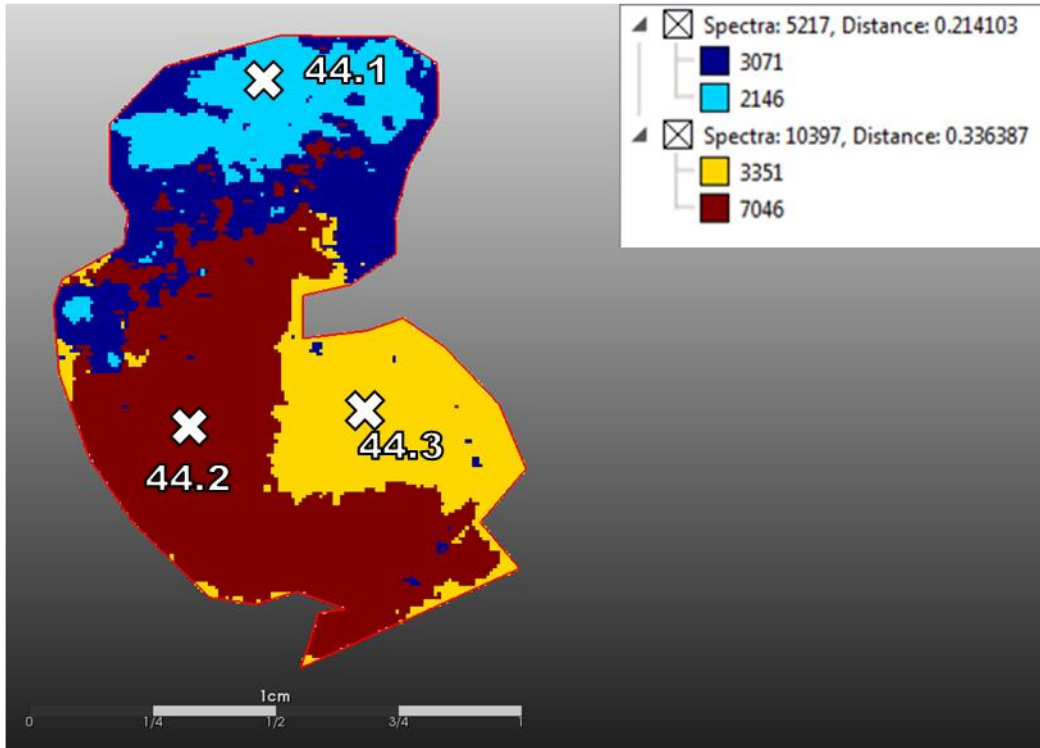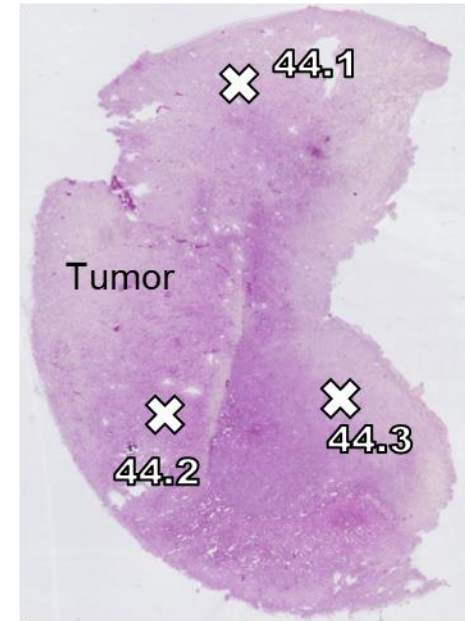

39

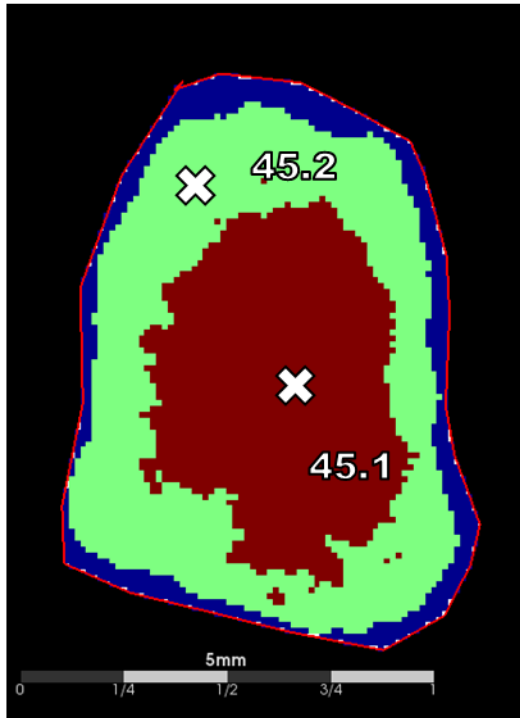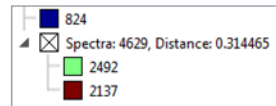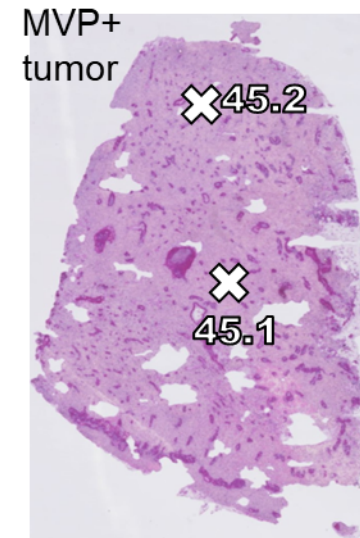

40

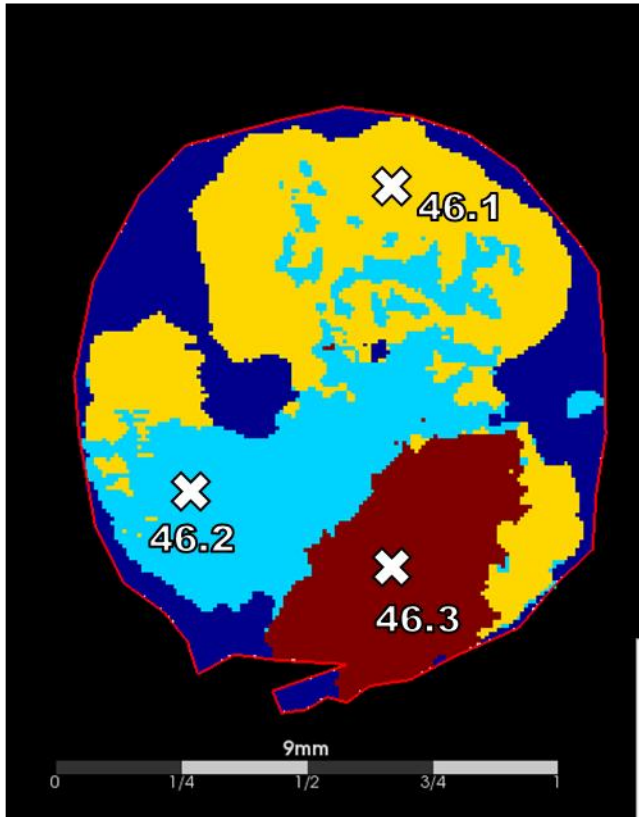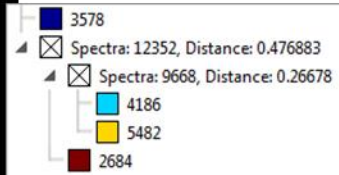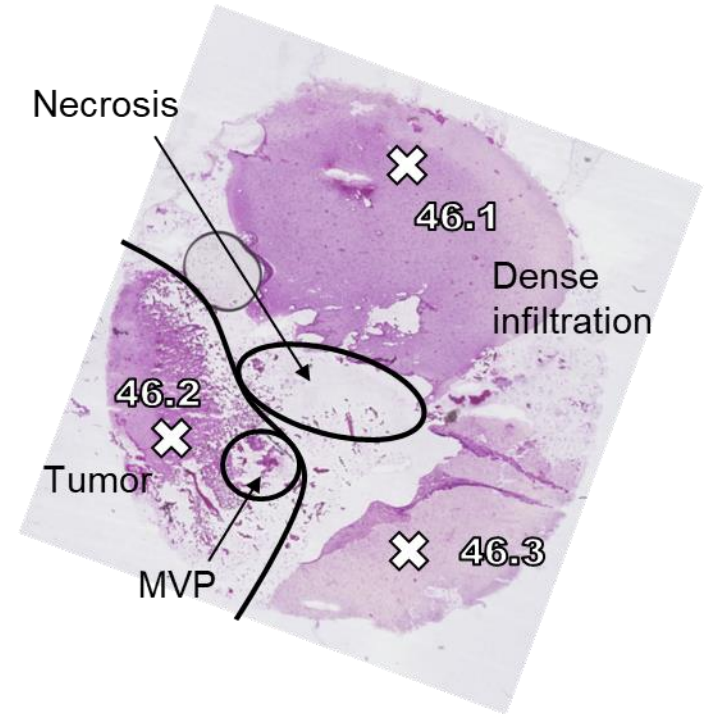



41

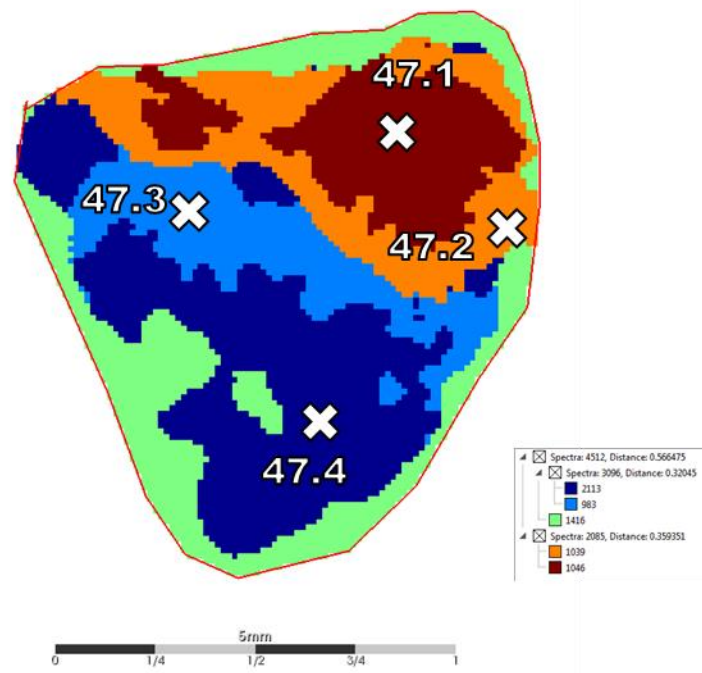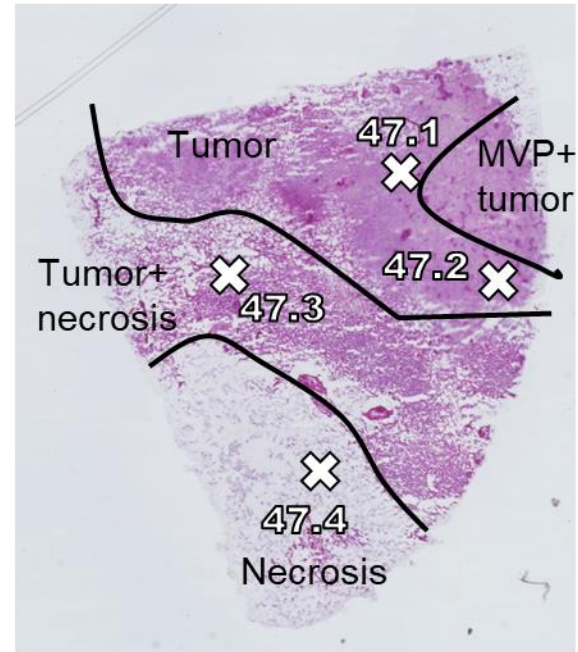

42

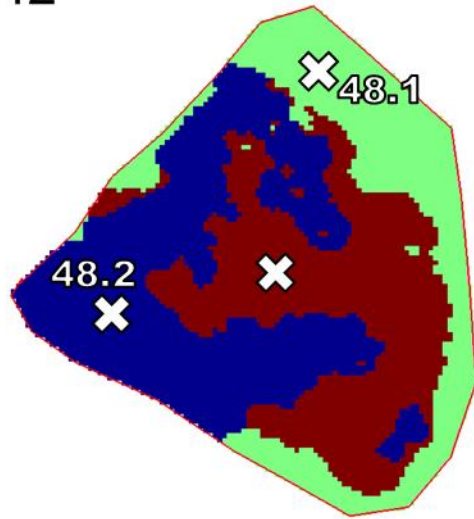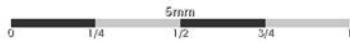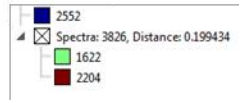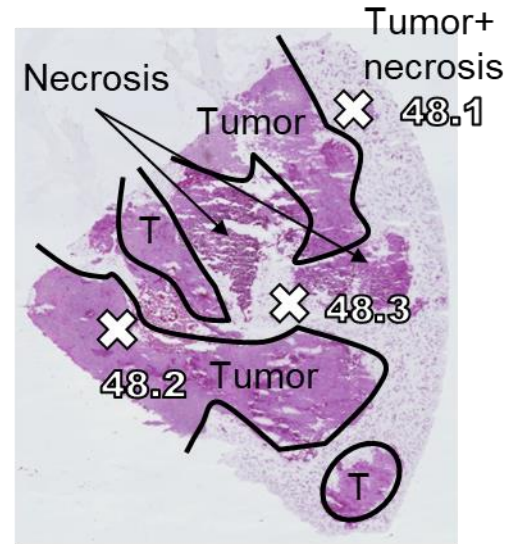

43

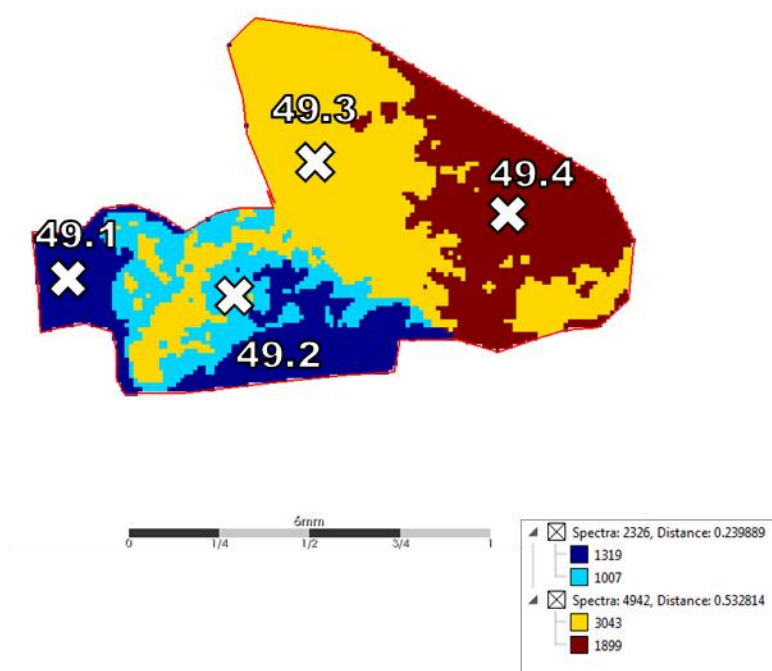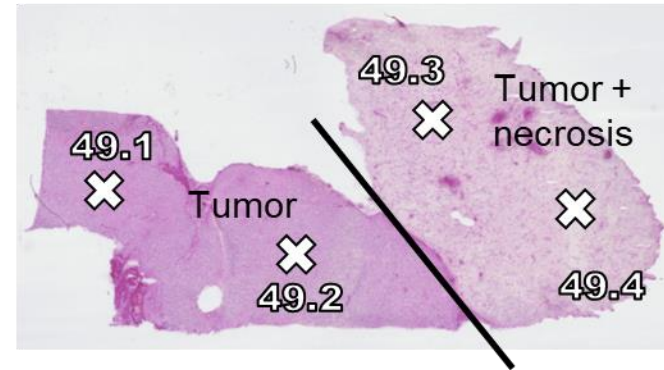

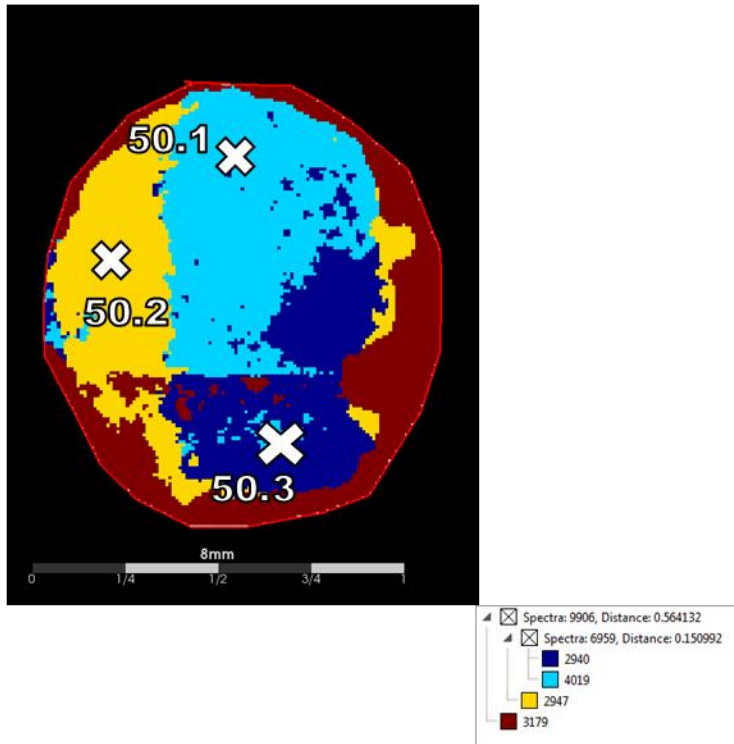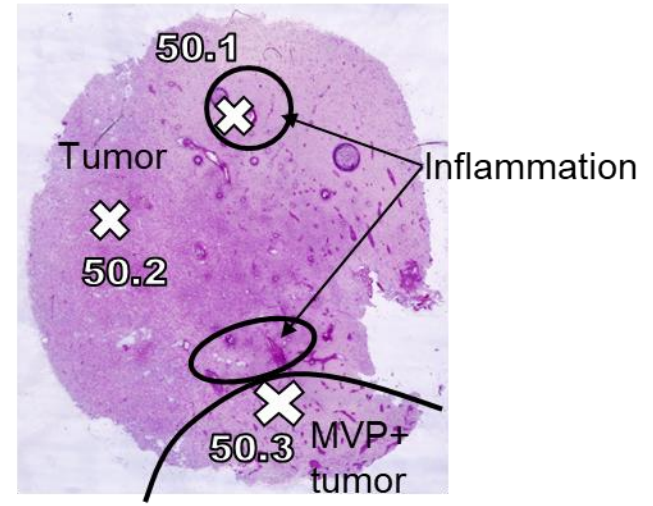

45

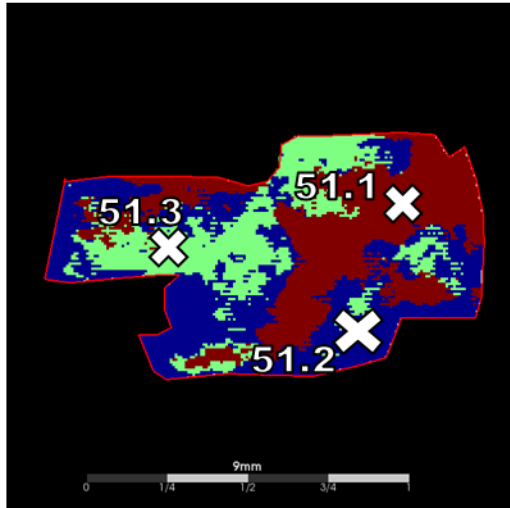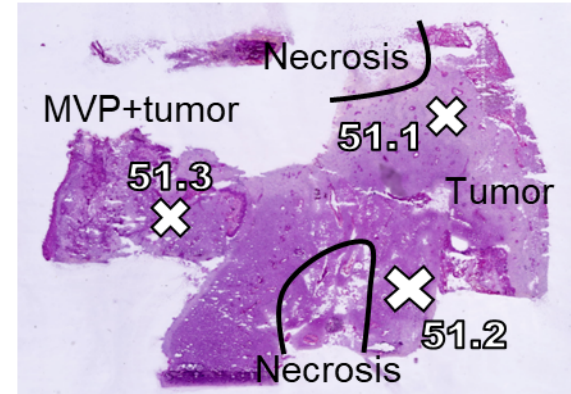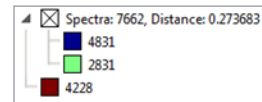

46

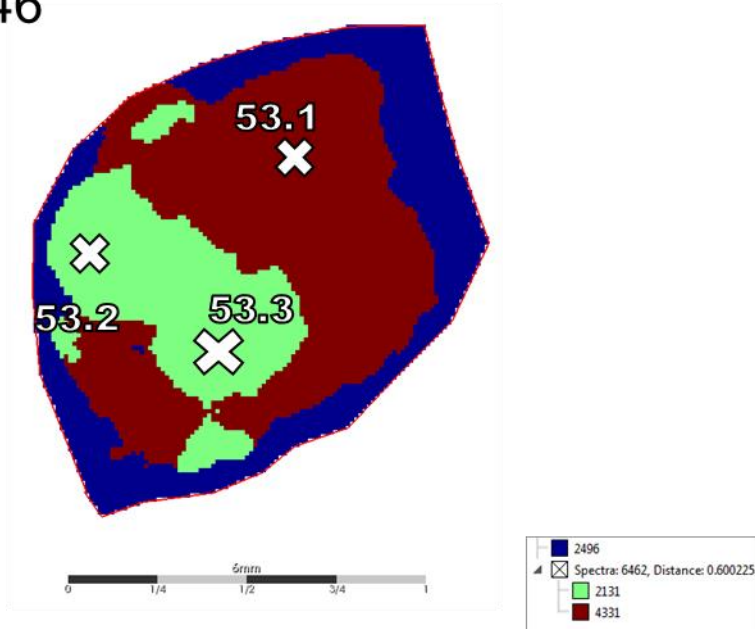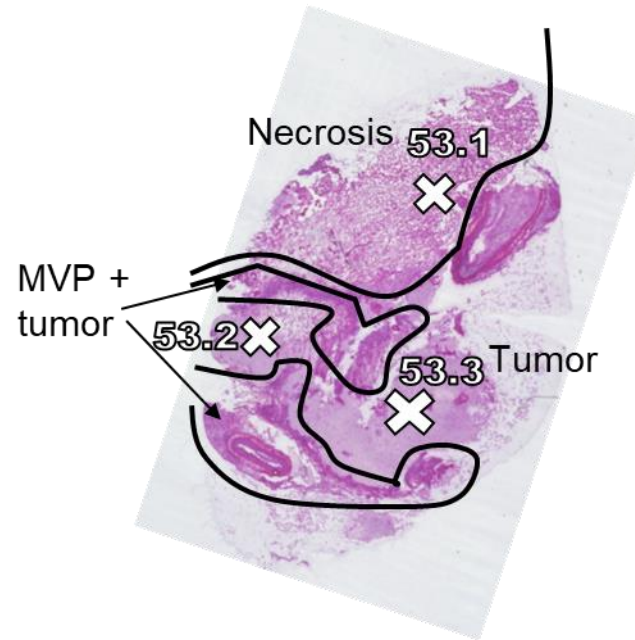

**Supplementary Figure 2:** Individual segmentation of 46 tumors by MALDI-MSI and comparison with pathologist annotations.

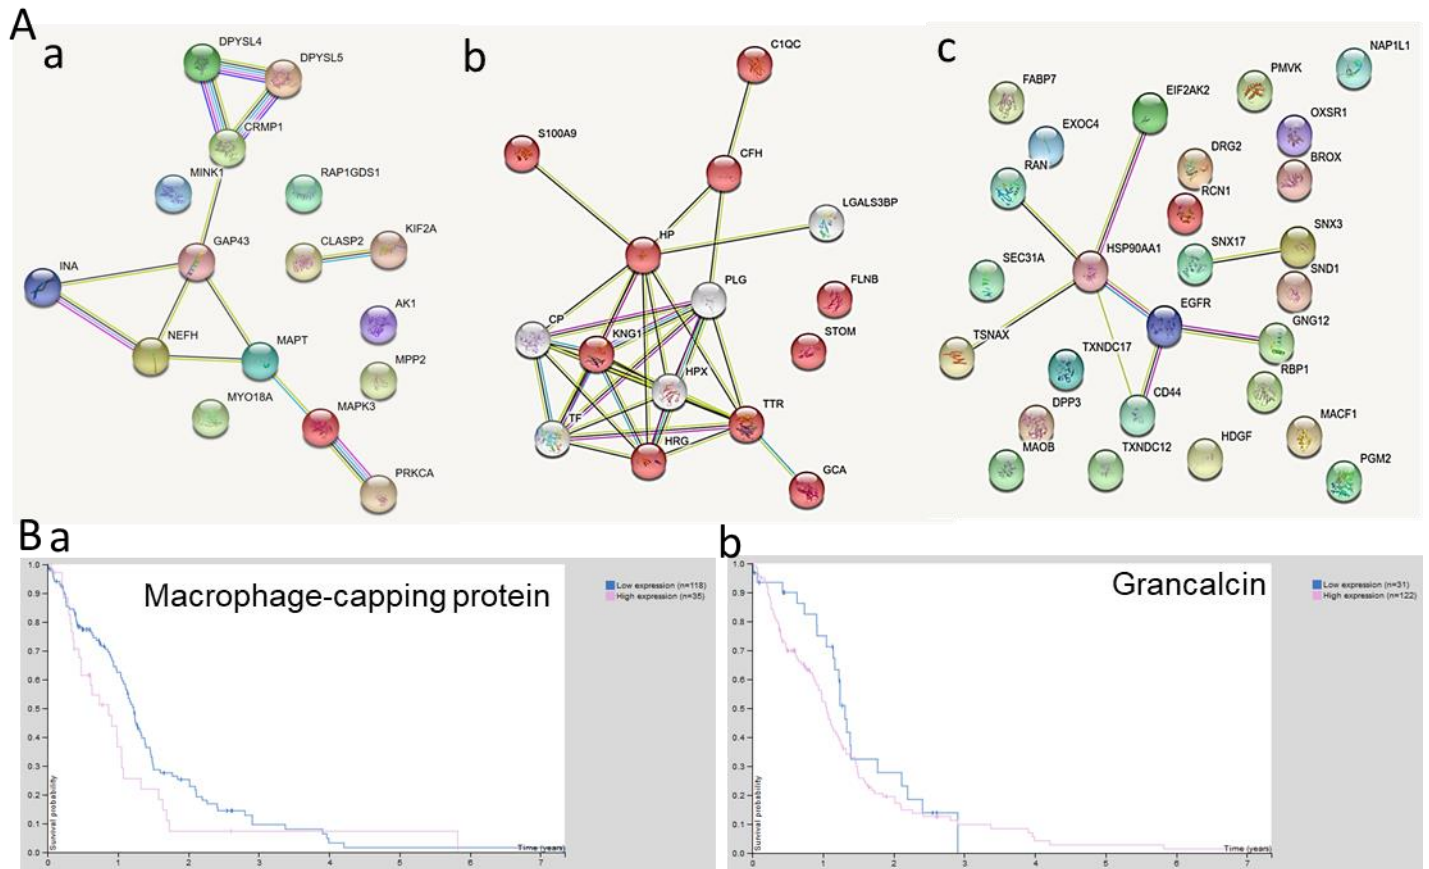

**Supplementary Figure 3.** String analysis of overexpressed proteins in each of the three proteomic groups and relation to patient survival **A. a)** Analysis of proteins overexpressed in group A shows involvement in axon guidance. **b)** Proteins overexpressed in group B and mainly involved in complements, coagulation cascade and, inflammation **c)** Analysis of overexpressed proteins in group C shows a network of proteins involved in Epstein Barr infection. **B.** Correlation between Grancalcin and CAPG expression and glioma patient survival according to the TGCA data. Patients were divided based on level of expression into “low” or “high” (n = 153 patients).

a

|                                                                      | Pr > Chi-Square |
|----------------------------------------------------------------------|-----------------|
| <b>Karnofsky indice at diagnostic 0-80 vs. 90-100</b>                | 0.1051          |
| <b>MGMT</b>                                                          | 0.0882          |
| <b>Quality of resection complete, subtotal vs. partial, biopsies</b> | 0.7666          |

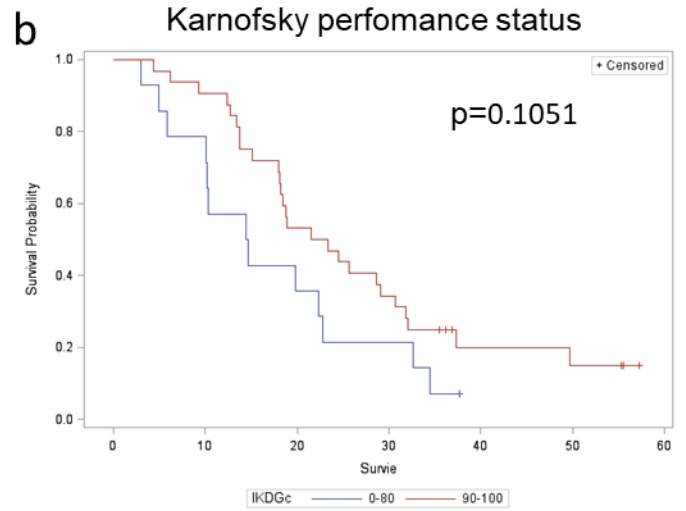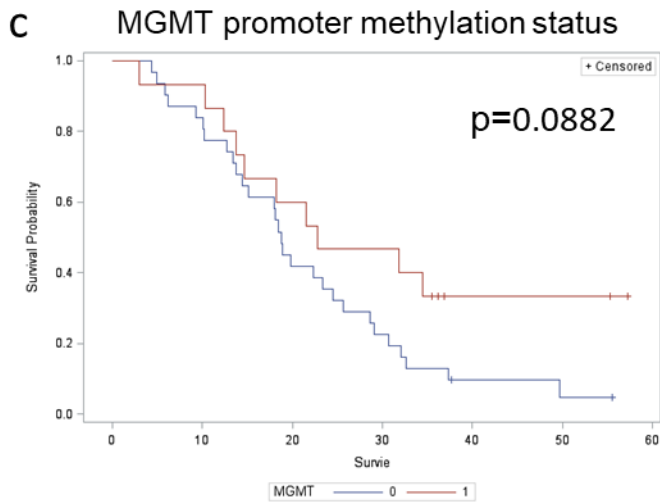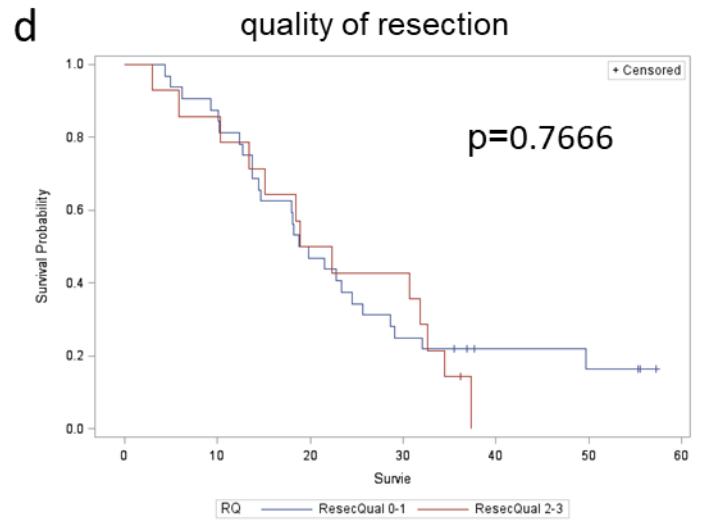

**Supplementary Figure 4.** Survival curves of all patients according to the Karnofsky performance status, MGMT promoter methylation status, and quality of resection. (a) Clinicopathological factors description ( $\chi^2$ -test). Survival curves (Kaplan-Meier Analysis) of patients according to the Karnofsky performance status (b), MGMT status (c), and resection quality (d). n = 46 patients. The lifetest procedure was used for the statistical analyses (log-rank test, Wilcoxon test).



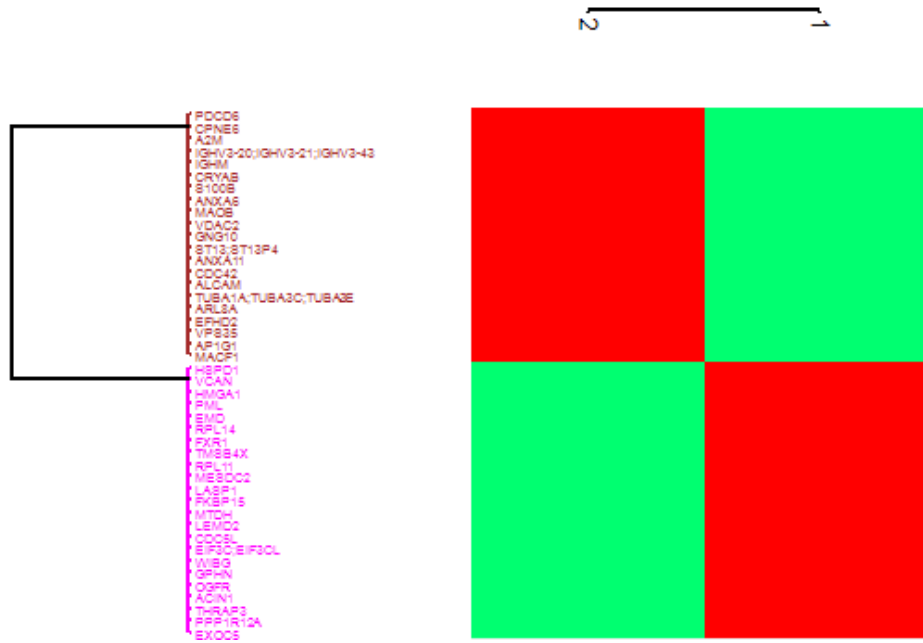

**Supplementary Figure 5.** Heatmap of the proteins significantly overexpressed in either of the 2 OS clusters (cluster 1 and cluster 2) with a  $p < 0.05$ . Heatmap obtained from the spatially resolved proteomic data which significantly showing overexpression of proteins correlating with the 2 OS clusters (cluster 1 and cluster 2) presenting identified in the patient prospective cohort with a  $p < 0.05$ . This heatmap only includes the RefProts and does not include the 5 AIProts with a  $p < 0.05$ . Statistical analyses were performed using ANOVA.

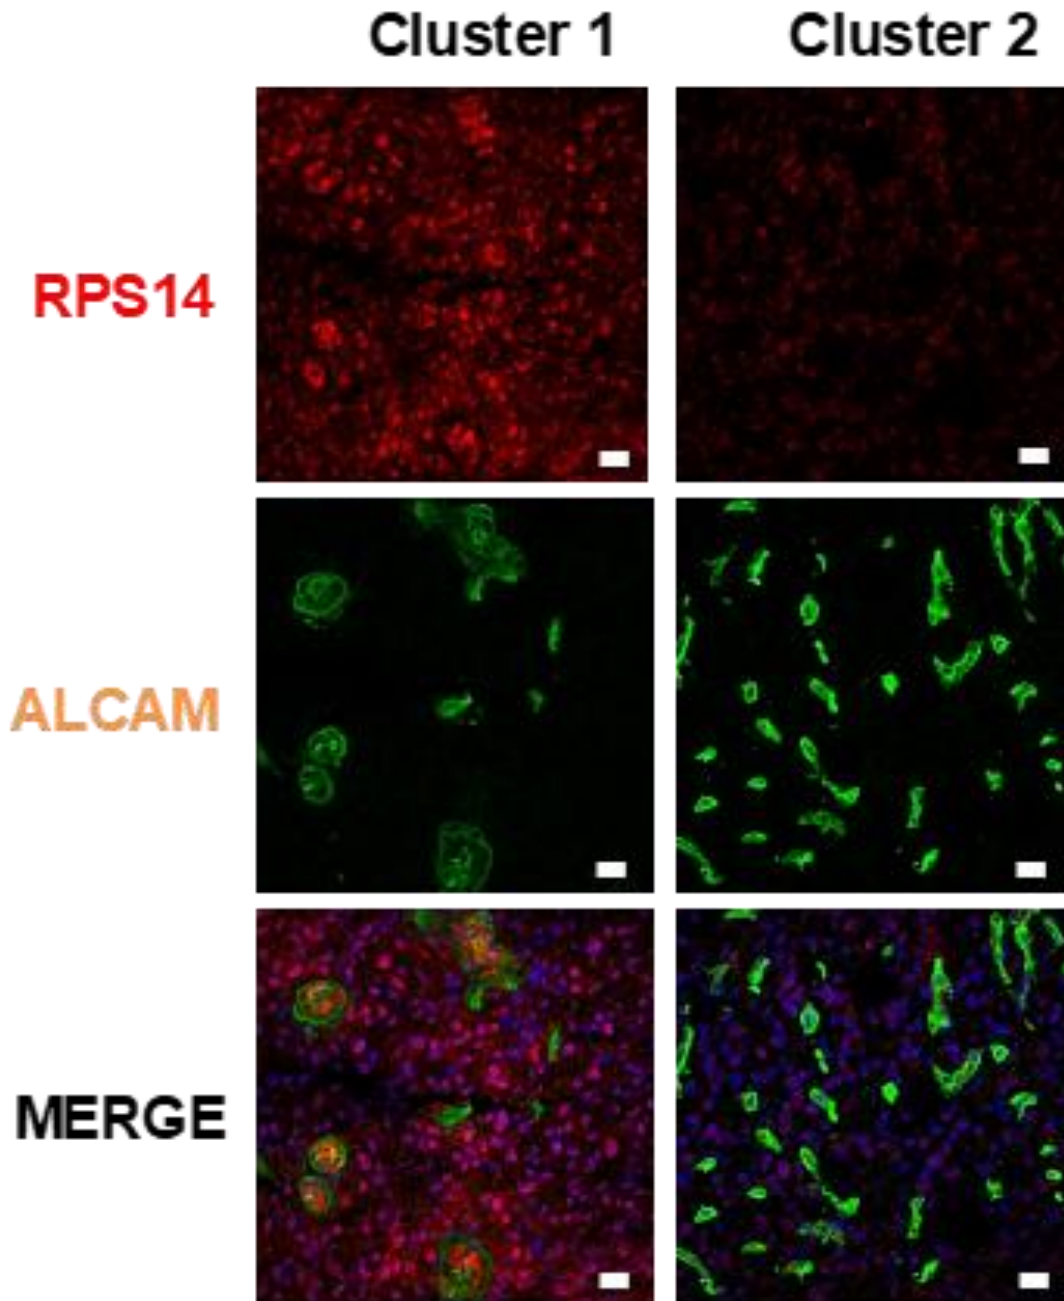

**Supplementary Figure 6.** Validation immunohistochemistry of RPS14 and ALCAM markers. Representative fluorescence images of RPS14 and ALCAM in the two OS clusters of patients. ALCAM is associated with a bad prognosis while RPS14 is related to a good prognosis. Images were acquired with a confocal microscope at 40x magnification. The experiment was repeated on representative tissues of 23 patients for the prospective cohort and on representative tissues of 50 patients for the validation cohort. For each tissue, 3 to 4 images were taken for quantification. scale bar = 20  $\mu$ m

A

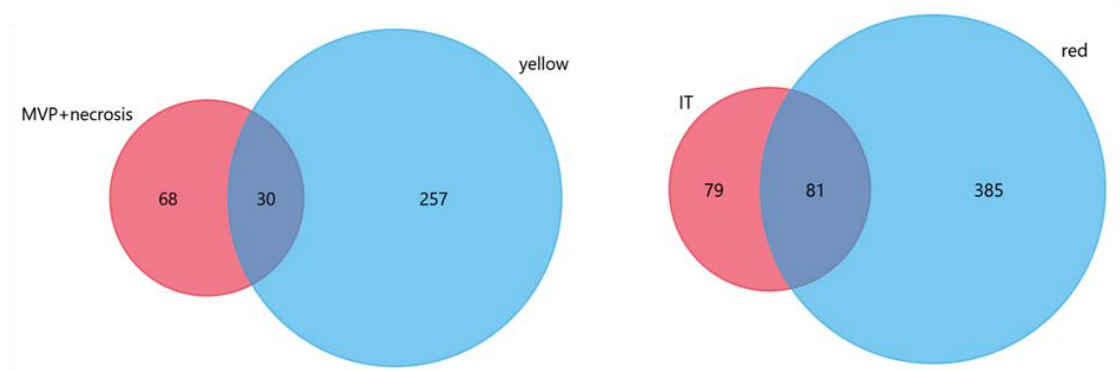

B

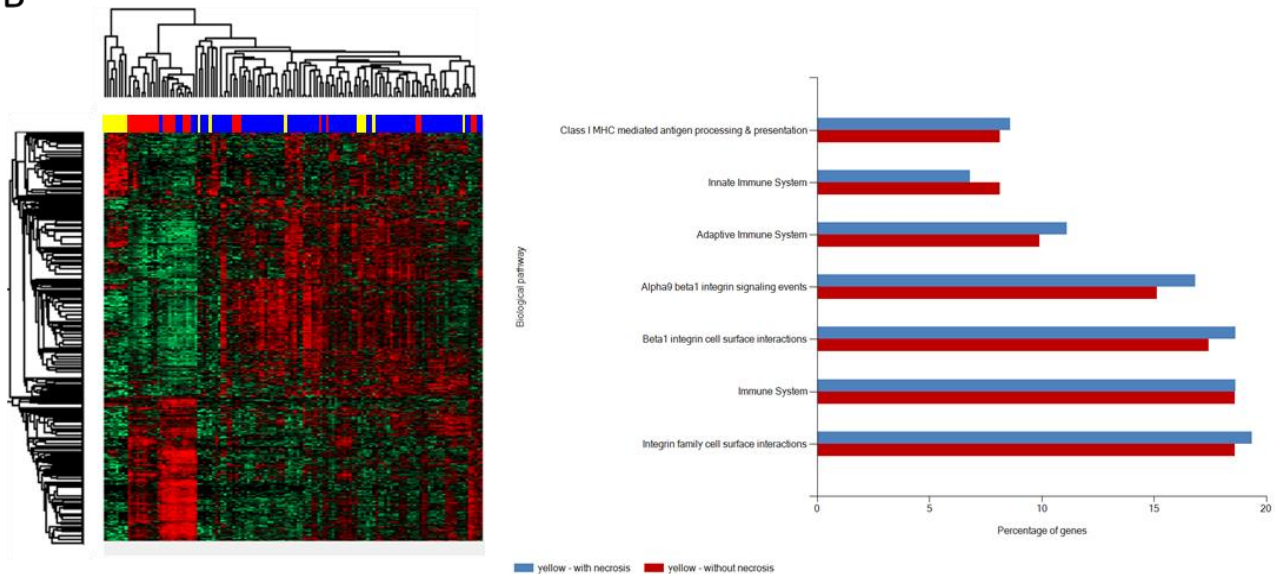

**Supplementary Figure 7. Impact of histological features on proteomics analysis. A. Comparative analysis with the study of Lam *et al.* (2022)<sup>1</sup>.** Venn Diagrams comparing the number of common and differential proteins either in group B (yellow) vs the histological region “MVP+necrosis” of the study of Lam *et al.* or in group A (red) vs the histological region named infiltrated tumor (IT) of the study of Lam *et al.* **B. Proteomics analysis without the micro-extracted points in the necrotic region.** Heatmap of proteins with different regulation profiles as determined by label-free quantification in the three groups without the proteins coming from the necrotic region and comparative analysis of the biological pathways enriched in group B (yellow) with or without the necrotic region.

## Supplementary References

<sup>1</sup> Lam, K. H. B. et al. Topographic mapping of the glioblastoma proteome reveals a triple-axis model of intra-tumoral heterogeneity. *Nat. Commun.* 13, (2022).
